# Supplementary material for: Discovery of the Active Compounds of the Ethyl Acetate Extract Site of Ardisia japonica (Thunb.) Blume for the Treatment of Acute Lung Injury
Source: MDPI journal article supplement (doi:10.3390/molecules29040770), 2024-02-07
Supplement: s1 [file s1]

| PE site |        | Compound category | Name                                                                                               | formula   | Ion mode | RT       | Response | Theoretical value | Measured value                                            | MS/MS                                                                               |
|---------|--------|-------------------|----------------------------------------------------------------------------------------------------|-----------|----------|----------|----------|-------------------|-----------------------------------------------------------|-------------------------------------------------------------------------------------|
| 1       | 15     | phenylpropanoid   | (E)-p-coumaric acid                                                                                | C9H8O3    | +        | 7.52     | 4.51E+06 | 165.0546          | 165.0538                                                  | 147.04334,119.04449,93.03310                                                        |
| 2       | 15     | phenylpropanoid   | Evodiamine                                                                                         | C19H16O4  | +        | 7.42     | 6.47E+06 | 170.0320          | 170.0320                                                  | 131.03813,135.04262                                                                 |
| 3       | 11     | phenylpropanoid   | IN00458                                                                                            | C9H6O3    | +        | 8.86     | 1.63E+06 | 163.0390          | 163.0381                                                  | 135.04334,105.03292,77.03817                                                        |
| 4       | 12     | phenylpropanoid   | Umbelliferone                                                                                      | C9H6O3    | +        | 12.89    | 3.58E+07 | 163.0390          | 163.0381                                                  | 135.04327                                                                           |
| 5       | 513    | phenylpropanoid   | Coumarin                                                                                           | C9H6O2    | +        | 9.85     | 1.10E+07 | 147.0441          | 147.0432                                                  | 119.04485,105.05367                                                                 |
| 6       | 725    | phenylpropanoid   | 3-Phenyl-1-propanol                                                                                | C9H10O    | +        | 7.23     | 2E+07    | 137.0494          | 137.0494                                                  | 119.04493,93.06043,91.05378,79.05384,77.03822                                       |
| 7       | 799    | phenylpropanoid   | 3-Phenylpropanoic acid                                                                             | C9H10O2   | +        | 8.85     | 5.01E+06 | 151.0746          | 151.0746                                                  | 133.06416,105.06029,84.95926,79.05381,77.03818,57.03319,55.01753                    |
| 8       | 8205   | phenylpropanoid   | onnamyl isolate                                                                                    | C14H16O2  | +        | 10.48    | 2.75E+06 | 217.1223          | 217.1214                                                  | 135.07971,107.0693,105.0693,91.05338,79.0538                                        |
| 9       | 1319   | phenylpropanoid   | 3-Phenyl-1-propanol                                                                                | C9H10O    | +        | 7.23     | 2E+07    | 137.0494          | 137.0494                                                  | 119.04493,93.06043,91.05378,79.05384,77.03818,57.03319,55.01753                     |
| 10      | 2391   | phenylpropanoid   | Bergapten                                                                                          | C12H8O4   | +        | 9.71     | 7.06E+07 | 217.0495          | 217.0487                                                  | 173.0588,171.0434,147.0433                                                          |
| 11      | 112496 | phenylpropanoid   | Asarone                                                                                            | C12H16O3  | +        | 10.60    | 6.39E+07 | 209.1272          | 209.1163                                                  | 194.0928,163.0745,131.0745,131.0746,121.0641,106.0643,95.0487,79.0539               |
| 12      | 12552  | phenylpropanoid   | 6,7,8-trimethoxy-2H-chromen-2-one                                                                  | C12H12O5  | +        | 7.97     | 1.76E+07 | 237.0758          | 237.0747                                                  | 205.0489,162.0615,162.0303,137.0589,107.0485                                        |
| 13      | 1719   | phenylpropanoid   | 4-Methoxy-4-(prop-2-en-1-yl)-2H-1,3-benzodioxole                                                   | C12H14O3  | +        | 10.52    | 1.32E+06 | 183.0868          | 183.0868                                                  | 150.089,135.0435                                                                    |
| 14      | 1728   | phenylpropanoid   | Ethyl onnamate                                                                                     | C11H12O2  | +        | 6.42     | 3.52E+06 | 177.0910          | 177.0900                                                  | 149.0589,103.0579,91.0537,77.0382                                                   |
| 15      | 1749   | phenylpropanoid   | Scopoletin                                                                                         | C11H10O4  | +        | 7.37     | 1.83E+07 | 207.0652          | 207.0644                                                  | 179.0693,163.0746,148.0511,119.0485                                                 |
| 16      | 1755   | phenylpropanoid   | Fraxetin                                                                                           | C10H8O5   | +        | 4.62     | 7.4E+07  | 209.0444          | 209.0433                                                  | 191.0331,177.0173,165.0571,149.0589,135.0538,139.0383,109.0278                      |
| 17      | 1761   | phenylpropanoid   | Scopoletin                                                                                         | C10H8O4   | +        | 9.36     | 3.67E+06 | 193.0495          | 193.0486                                                  | 165.1365,150.0303,135.0435,123.0591,107.0486,95.0487                                |
| 18      | 18263  | phenylpropanoid   | Herniarin                                                                                          | C10H8O3   | +        | 9.84     | 1.80E+07 | 177.0546          | 177.0537                                                  | 149.0589,145.0277,131.0485,103.0537,77.0381                                         |
| 19      | 1887   | phenylpropanoid   | Isoscutellin                                                                                       | C10H12O2  | +        | 14.99    | 9.72E+06 | 165.0591          | 165.0580                                                  | 147.0797,137.0520,135.0747,123.0433,107.0486,93.0329,77.0382                        |
| 20      | 2086   | phenylpropanoid   | 6,2-Di-Methoxyvinaminaldehyde                                                                      | C10H10O2  | +        | 12.11    | 1.33E+06 | 163.0744          | 163.0744                                                  | 135.0483,107.0485,105.0328,79.0538,77.0382                                          |
| 21      | 21507  | phenylpropanoid   | 1256801                                                                                            | C17H20O4  | +        | 11.90    | 3.56E+06 | 289.1420          | 289.1420                                                  | 145.0640,177.1264,133.0641                                                          |
| 22      | 22175  | phenylpropanoid   | Hexyl onnamaldehyde                                                                                | C15H20O   | +        | 14.40    | 4.20E+07 | 217.1587          | 217.1578                                                  | 175.1108,147.0797,133.1005,105.0693,91.0538                                         |
| 23      | 23088  | phenylpropanoid   | AKOS R8-2919                                                                                       | C19H14O   | +        | 9.46     | 3.21E+06 | 193.1117          | 193.1110                                                  | 175.0380,172.0953,147.0433                                                          |
| 24      | 439    | terpene           | Isoprene                                                                                           | C5H8      | +        | 9.46     | 3.21E+06 | 193.1117          | 193.1110                                                  | 97.10066,97.06427,83.04871,81.06947,67.05386,55.05393                               |
| 25      | 2980   | terpene           | (Gbeta)-28-Hydroxyulcin-20(9)-en-3-yl (2E)-3,4-dihydro-2H-pyran-2-yl                               | C39H56O4  | +        | 16.00    | 1.01E+08 | 589.4251          | 589.4253                                                  | 121.0638,109.1005,81.0694,79.0538,69.0696,67.0539,55.0540                           |
| 26      | 2983   | terpene           | Euphorbiolipifolene                                                                                | C36H44O11 | +        | 24.44    | 8.89E+07 | 653.2946          | 653.2946                                                  | 92.0694,69.0696,67.0538,55.0540,53.0537                                             |
| 27      | 319    | terpene           | 3-Acetoxy-12-en-23-oic acid                                                                        | C20H32O5  | +        | 19.70    | 1.93E+07 | 409.2375          | 409.2375                                                  | 123.1162,109.1005,85.0850,81.0695,67.0539,57.0696,55.0540                           |
| 28      | 352    | terpene           | Betulinal                                                                                          | C30H50O   | +        | 29.71    | 2.00E+07 | 443.3884          | 443.3857                                                  | 121.1006,109.1006,81.0695,69.0695,67.0539                                           |
| 29      | 355    | terpene           | 1916451                                                                                            | C30H50O   | +        | 19.81    | 3.43E+06 | 427.3934          | 427.3914                                                  | 111.1163,109.1007,105.0694,81.0695,69.0696,67.0539                                  |
| 30      | 360    | terpene           | Asiatic acid                                                                                       | C30H48O3  | +        | 12.25    | 2.27E+06 | 469.3515          | 469.3553                                                  | 90.0747,97.1007,95.0850,89.0593,85.1008,83.0851,69.0696,67.0539,57.0696,55.0539     |
| 31      | 365    | terpene           | NP-00880                                                                                           | C23H36O4  | +        | 7.95     | 1.30E+06 | 389.2484          | 389.2484                                                  | 109.1006,93.0694,81.0695,79.0538,70.0648,67.0539,55.0539                            |
| 32      | 9167   | terpene           | (4aS,5R,6S,8aS)-5-[(3E)-5-methoxy-3-methyl-5-oxopent-1-en-1-yl]-2,3-dimethyl-2,3-dihydro-1H-indene | C21H32O4  | +        | 17.47    | 2.98E+08 | 349.2373          | 331.2225                                                  | 149.0954,95.0850,80.0851,81.0694,69.0695,67.0539,57.0696,55.0539                    |
| 33      | 10733  | terpene           | NP-006817                                                                                          | C21H32O3  | +        | 17.17    | 9.96E+07 | 332.2424          | 332.2421                                                  | 83.0851,81.0694,69.0695,67.0539,55.0539                                             |
| 34      | 1085   | terpene           | NP-006817                                                                                          | C20H36O   | +        | 15.42    | 1.56E+06 | 243.2754          | 243.2754                                                  | 117.0540,105.0693,97.1007,81.0695,67.0539,57.0696,55.0539                           |
| 35      | 12181  | terpene           | 7-Hydroxy-4a,6a,7-trimethyl-2,3-dihydro-1H-indene                                                  | C19H30O3  | +        | 16.35    | 1.11E+07 | 307.2268          | 307.2254                                                  | 139.0746,123.1162,97.1007,95.0850,69.0695,55.0540                                   |
| 36      | 131648 | terpene           | 1-(5S,6S)-Tetramethyl-5,6,7,8-tetrahydro-2-naphthalene                                             | C16H22O   | +        | 10.48    | 1.46E+07 | 231.1743          | 231.1733                                                  | 175.0643,133.0643,103.0330                                                          |
| 37      | 14715  | terpene           | NP-001717                                                                                          | C15H26O3  | +        | 14.68    | 2.53E+07 | 255.1955          | 255.1942                                                  | 219.1734,97.1006,83.0851,71.0488,69.0695,55.0539,55.0176                            |
| 38      | 1543   | terpene           | 2-Ethyl-2-methyl-2-butanol                                                                         | C15H22O   | +        | 19.72    | 1.36E+06 | 223.0764          | 223.0764                                                  | 187.1473,85.0644                                                                    |
| 39      | 16002  | terpene           | DEHYDROCOCTUS LACTONE                                                                              | C15H18O2  | +        | 10.80    | 3.15E+07 | 231.1380          | 231.1369                                                  | 175.0747,159.1159,131.0849                                                          |
| 40      | 17237  | terpene           | 2-[1E]-1-Buten-3-yn-1-yl-1,3,3-trimethyl-2,3-dihydro-1H-indene                                     | C15H18O   | +        | 11.45    | 3.71E+07 | 175.1481          | 175.1472                                                  | 175.1472                                                                            |
| 41      | 1791   | terpene           | Neopterin                                                                                          | C10H18O   | +        | 12.04    | 4.47E+06 | 155.1472          | 155.1472                                                  | 117.0799,83.0487,69.0332                                                            |
| 42      | 19787  | terpene           | Pulegone                                                                                           | C10H18O   | +        | 8.46     | 3.96E+06 | 153.1279          | 153.1266                                                  | 109.0642,95.0550,81.0694,69.0695                                                    |
| 43      | 20816  | terpene           | 2-borneone                                                                                         | C10H18O   | +        | 18.02    | 2.78E+06 | 137.1325          | 137.1319                                                  | 137.1319                                                                            |
| 44      | 21657  | terpene           | 1-carboxy-3-hydroxyadamantane                                                                      | C11H16O3  | +        | 7.08     | 7.44E+07 | 197.1172          | 197.1163                                                  | 179.1057,161.0952,151.1110,133.1005,79.0538,77.0382                                 |
| 45      | 2222   | terpene           | C13H24O3                                                                                           | +         | 19.70    | 1.02E+06 | 229.1786 | 229.1786          | 123.1162,109.1006,81.0695,69.0695,67.0539,57.0696,55.0540 |                                                                                     |
| 46      | 231217 | terpene           | 1,1,4,4-Tetramethyltetralin                                                                        | C14H20O   | +        | 14.50    | 1.87E+07 | 189.1830          | 189.1830                                                  | 147.1160,133.1004,77.0382                                                           |
| 47      | 241823 | terpene           | C1-Carvophyllene oxide                                                                             | C15H24O   | +        | 11.98    | 3E+08    | 221.1899          | 221.1891                                                  | 175.1472,161.1316,147.1160,133.1162,121.1005,109.1006                               |
| 48      | 1801   | terpene           | Hydroxy-2,10,10-trimethyl-2,3-dihydro-1H-indene                                                    | C15H24O   | +        | 16.42    | 2.35E+06 | 243.2754          | 243.2754                                                  | 208.1578,161.1473,137.1137,109.1006,95.0850                                         |
| 49      | 630    | terpene           | 4-15-(7-Hydroxy-5,5,8-trimethyl-2-methylene)-dec-2-ene                                             | C24H40O5  | +        | 19.16    | 2.36E+07 | 409.2945          | 409.2932                                                  | 181.0850,169.0850,154.0617,109.1006,95.0851,83.0851,81.0695,69.0695,57.0696,55.0539 |
| 50      | 27191  | terpene           | (Gbeta)-3-(3,3-Dimethylbutyryloxy)ulcin-20-en-28-oic acid                                          | C36H58O4  | +        | 17.63    | 1.24E+06 | 555.4048          | 555.4383                                                  | 555.4383                                                                            |
| 51      | 28255  | terpene           | Lup-20(9)-ene-3,28-diol (2E,3E,8S,3-phenylacetyl)                                                  | C38H62O4  | +        | 18.62    | 3.89E+07 | 703.4721          | 703.4714                                                  | 81.0695,79.0539,69.0695,67.0539,55.0539                                             |
| 52      | 1472   | terpene           | NP-0154                                                                                            | C17H24O   | +        | 14.43    | 2.02E+06 | 283.1786          | 283.1786                                                  | 149.0953,119.0484,107.0486,95.0850,81.0694,81.0695                                  |
| 53      | 3012   | terpene           | ditranan-2-ol                                                                                      | C33H44O   | +        | 19.76    | 7.80E+07 | 457.3465          | 457.3472                                                  | 121.1006,109.1006,107.0486,95.0850,81.0695                                          |
| 54      | 31294  | terpene           | 2595                                                                                               | C13H20O   | +        | 9.01     | 1.12E+07 | 193.1587          | 193.1577                                                  | 165.1266,151.1109,109.0642,83.0487,69.0331                                          |
| 55      | 1441   | terpene           | 3,5-Dimethyladamantan-1-ol                                                                         | C15H24O   | +        | 14.10    | 1.05E+06 | 231.1777          | 231.1777                                                  | 133.1285,119.0547,83.0332                                                           |
| 56      | 33407  | terpene           | camodierol A                                                                                       | C30H44O2  | +        | 16.67    | 5.96E+06 | 437.3414          | 437.3392                                                  | 123.1162,109.1006,95.0850,83.0851,81.0695,71.0486,69.0695,67.0539,57.0696,55.0539   |
| 57      | 106821 | steroid           | NP-005821                                                                                          | C30H46O2  | +        | 11.96    | 2.78E+07 | 455.3200          | 455.3495                                                  | 135.1162,123.1162,107.0486,95.0850,81.0695,69.0695,67.0539,55.0540                  |
| 58      | 420    | steroid           | Stigmasterol                                                                                       | C29H48O   | +        | 19.76    | 1.87E+08 | 413.3778          | 413.3757                                                  | 123.0798,109.0643,95.0851,83.0487,81.0695                                           |
| 59      | 442    | steroid           | Cholesterol                                                                                        | C27H46O   | +        | 19.76    | 1.87E+08 | 413.3778          | 413.3757                                                  | 123.0798,109.0643,95.0851,83.0487,81.0695                                           |
| 60      | 443    | steroid           | (28:38,9E,17Z,22E)-2,3,14,20,22-Pentahydroxysterol-7                                               | C28H46O6  | +        | 12.77    | 5.68E+06 | 479.367           | 479.336                                                   | 109.1006,109.0729,95.0850,83.0851,81.0695,69.0695,67.0539                           |
| 61      | 4502   | steroid           | (Galpha)5alpha-(21-4)-Methylphenylpropan-20-yn-3-ol                                                | C28H38O   | +        | 20.05    | 2.03E+06 | 391.2995          | 391.2979                                                  | 157.1003,23.1160,105.0693,97.1007,93.0694,91.0538,79.0538                           |
| 62      | 459    | steroid           | (Gbeta)5alpha-(21-4)-Methylphenylpropan-20-yn-3-ol                                                 | C28H38O   | +        | 22.02    | 2.26E+06 | 467.3367          | 467.3363                                                  | 121.1006,109.1006,107.0486,95.0850,81.0695,69.0695,67.0539,55.0540                  |
| 63      | 464    | steroid           | Cholesterol-4-ene-3-one                                                                            | C27H44O   | +        | 18.93    | 2.22E+06 | 383.2499          | 383.2499                                                  | 139.0798,109.0643,95.0850,83.0487,81.0695,71.0486,69.0695,67.0539,55.0540           |
| 64      | 8331   | steroid           | 3alpha,7alpha-Dihydroxylcholesterol                                                                | C24H40O4  | +        | 15.93    | 3.22E+06 | 393.2999          | 393.2999                                                  | 109.1006,97.0643,95.0850,83.0487,69.0695,67.0539,57.0696,55.0540                    |
| 65      | 954    | steroid           | 17beta,23-Methoxy-17-tetrahydro-2H-zran-2-ylol                                                     | C24H34O3  | +        | 16.99    | 1.64E+06 | 371.2581          | 371.2568                                                  | 109.0592,83.0488,71.0486,95.0850,81.0695,69.0695,67.0539,55.0540                    |
| 66      | 1012   | steroid           | Neopterin                                                                                          | C10H18O   | +        | 12.04    | 4.47E+06 | 155.1472          | 155.1472                                                  | 117.0799,83.0487,69.0332                                                            |
| 67      | 11113  | steroid           | 17beta,23-Methoxy-17-tetrahydro-2H-zran-2-ylol                                                     | C20H24O2  | +        | 15.13    | 3.88E+06 | 297.1845          | 297.1835                                                  | 131.0849,125.0955,121.1109,108.0497,100.0746,83.0487,81.0695,67.0539,55.0540        |
| 68      | 12115  | steroid           | Boldione                                                                                           | C19H24O2  | +        | 14.90    | 1.20E+07 | 285.1849          | 285.1839                                                  | 187.1112,149.1316                                                                   |
| 69      | 13187  | steroid           | Farnesol                                                                                           | C18H24O2  | +        | 11.80    | 1.43E+07 | 288.1786          | 288.1765                                                  | 173.0652,147.0796,109.0642,107.0485,97.0643,95.0850,81.0694,55.0539                 |
| 70      | 1401   | steroid           | 18-Norandrostenedione                                                                              | C18H24O2  | +        | 12.81    | 1.43E+07 | 288.1786          | 288.1765                                                  | 125.1108,123.1116,107.0485,95.0850,83.0694,81.0695,79.0539,55.0539                  |
| 71      | 15143  | steroid           | 2-Hydroxysterone                                                                                   | C18H24O2  | +        | 12.22    | 7.71E+05 | 287.1842          | 287.1829                                                  | 193.1213,189.0901,123.0434                                                          |
| 72      | 16120  | steroid           | 3-Dioxysterone                                                                                     | C18H22O   | +        | 11.54    | 1.55E+07 | 255.1743          | 255.1733                                                  | 165.1266,151.1109,109.0642,83.0487,81.0695                                          |
| 73      | 187    | flavonoid         | Neopterin                                                                                          | C12H16O5  | +        | 6.08     | 2.92E+06 | 255.1427          | 255.1427                                                  | 91.0487,89.0592,57.0332                                                             |
| 74      | 212    | flavonoid         | Phloretin                                                                                          | C15H14O5  | +        | 11.22    | 1.50E+08 | 273.0767          | 273.0740                                                  | 273.0740                                                                            |
| 75      | 3490   | flavonoid         | Genistein                                                                                          | C15H10O5  | +        | 6.22     | 5.11E+04 | 269.0455          | 269.0456                                                  | 269.0456                                                                            |
| 76      | 4157   | flavonoid         | 5,6,7-Dihydroxy-3-methoxy-4-oxo-4H-chromen-2-one                                                   | C21H20O11 | +        | 8.06     | 3.62E+07 | 447.0833          | 447.0817                                                  | 447.0817                                                                            |
| 77      | 459    | quinone           | 2-Hydroxy-5-methoxy-3-(10-pentadecylbenzo)-3-one                                                   | C22H32O4  | +        | 2.30     | 2.51E+06 | 382.2514          | 382.2514                                                  | 279.0903,165.0537,133.0538,125.0953,123.0434,107.0486                               |
| 78      | 21479  | quinone           | Embelin                                                                                            | C17H26O4  | +        | 14.26    | 1.71E+07 | 295.1004          | 295.1003                                                  | 295.1003,195.1370,167.1421,155.0332                                                 |
|         |        |                   |                                                                                                    |           |          |          |          |                   |                                                           |                                                                                     |

|     |     |      |                      |                                                                          |            |   |       |          |          |          |                                                              |
|-----|-----|------|----------------------|--------------------------------------------------------------------------|------------|---|-------|----------|----------|----------|--------------------------------------------------------------|
| 169 | 88  | 2192 | phenolic acids, carl | 1-Ethynyl-4-hexylbenzene                                                 | C14 H18    | + | 11.70 | 8.61E+06 | 187.1481 | 187.1472 | 145.1005,119.0849,91.0538,79.0539                            |
| 170 | 89  | 2215 | phenolic acids, carl | 4-Methylbenzophenone                                                     | C14 H12 O  | + | 11.65 | 2.47E+06 | 197.0961 | 197.0953 | 166.0767,105.0330,77.0381                                    |
| 171 | 90  | 2224 | phenolic acids, carl | VO2978400                                                                | C13 H24 O2 | + | 9.24  | 1.46E+06 | 213.1849 | 213.1841 | 153.1267,69.0696                                             |
| 172 | 91  | 2244 | phenolic acids, carl | 3408                                                                     | C13 H22 O3 | + | 12.85 | 1.01E+07 | 227.1627 | 227.1632 | 181.1213,153.1266,83.0851,57.0696                            |
| 173 | 92  | 2246 | phenolic acids, carl | 12-Tridecynoic acid                                                      | C13 H22 O2 | + | 10.20 | 1.35E+07 | 211.1693 | 211.1683 | 123.1162,109.1006,95.0850,81.0695,67.0539                    |
| 174 | 93  | 2250 | phenolic acids, carl | 081804500                                                                | C13 H22 O  | + | 10.81 | 1.47E+06 | 195.1743 | 195.1734 | 111.0799,83.0852,69.0696                                     |
| 175 | 94  | 2288 | phenolic acids, carl | 645341                                                                   | C13 H20 O3 | + | 8.79  | 8.34E+06 | 225.1485 | 225.1475 | 167.1058,149.0954,123.0799,109.0643                          |
| 176 | 95  | 2293 | phenolic acids, carl | Spherophoriol                                                            | C13 H20 O2 | + | 12.52 | 4.21E+07 | 209.1536 | 209.1527 | 137.0589,135.0797,125.0590,111.0433,107.0485,95.0486         |
| 177 | 96  | 2302 | phenolic acids, carl | Hectylbenzene                                                            | C13 H20    | + | 19.39 | 1.46E+07 | 177.1638 | 177.1628 | 135.1162,121.1005,93.0694,79.0538                            |
| 178 | 97  | 2322 | phenolic acids, carl | p-Hydroxybenzoic Acid                                                    | C13 H10 O3 | + | 11.29 | 3.04E+07 | 223.1328 | 223.1319 | 197.0628,109.0643,95.0487,77.0381                            |
| 179 | 98  | 2326 | phenolic acids, carl | Heptanophenone                                                           | C13 H18 O  | + | 8.89  | 1.05E+08 | 191.1430 | 191.1421 | 149.0953,135.0797,117.0692,91.0537                           |
| 180 | 99  | 2360 | phenolic acids, carl | 1-[4-hydroxy-3-(3-methylbut-2-en-1-yl)phenyl]ethan                       | C13 H16 O2 | + | 10.41 | 2.37E+07 | 205.1223 | 205.1215 | 173.0951,145.1004,91.0538                                    |
| 181 | 100 | 2366 | phenolic acids, carl | Cyclohexyl phenyl ketone                                                 | C13 H16 O  | + | 9.50  | 1.44E+07 | 189.1274 | 189.1264 | 111.0798,105.0329,83.0851,79.0538                            |
| 182 | 101 | 2373 | phenolic acids, carl | 4-Pentylphenylacetylene                                                  | C13 H16    | + | 11.57 | 1.24E+07 | 173.1325 | 173.1315 | 157.1003,143.0848,117.0693,91.0538,77.0382                   |
| 183 | 102 | 2382 | phenolic acids, carl | 4-hex-1-ynylBenzaldehyde                                                 | C13 H14 O  | + | 10.56 | 1.17E+06 | 187.1117 | 187.1108 | 159.1160,103.0538,91.0538,77.0381                            |
| 184 | 103 | 2407 | phenolic acids, carl | NP-004036                                                                | C12 H22 O4 | + | 10.56 | 8.52E+06 | 231.1591 | 231.1582 | 117.0693,97.1007                                             |
| 185 | 104 | 2438 | phenolic acids, carl | acetic acid, ceranyl ester                                               | C12 H20 O2 | + | 10.75 | 8.92E+06 | 197.1536 | 197.1527 | 179.1058,125.0591,111.0435                                   |
| 186 | 105 | 2451 | phenolic acids, carl | 3-(3-methoxypropoxy)-4-methoxyphenylmethanol                             | C12 H18 O4 | + | 10.70 | 3.79E+06 | 227.1278 | 227.1267 | 135.0799,121.0643,109.0643,79.0539,77.0383                   |
| 187 | 106 | 2459 | phenolic acids, carl | Sedanolid                                                                | C12 H18 O2 | + | 12.02 | 4.27E+07 | 195.1380 | 195.1373 | 125.0590,111.0434,71.0852                                    |
| 188 | 107 | 2476 | phenolic acids, carl | Propofol                                                                 | C12 H18 O  | + | 13.64 | 8.25E+07 | 179.1430 | 179.1421 | 161.1318,147.1160,133.1004,119.0849                          |
| 189 | 108 | 2481 | phenolic acids, carl | 1-(1-butyl-4-ethyl)benzene                                               | C12 H18    | + | 11.45 | 1.06E+07 | 163.1481 | 163.1472 | 155.1161,57.0696,55.0539                                     |
| 190 | 109 | 2497 | phenolic acids, carl | 6-Phenylhexanoic acid                                                    | C12 H16 O2 | + | 14.07 | 1.27E+08 | 193.1223 | 193.1217 | 165.1265,147.1160,133.1005,119.0849,105.0693,91.0537,77.0382 |
| 191 | 110 | 2504 | phenolic acids, carl | 4-tert-Butylacetophenone                                                 | C12 H16 O  | + | 10.70 | 1.14E+07 | 177.1274 | 177.1267 | 133.1004,119.0849,91.0538                                    |
| 192 | 111 | 2511 | phenolic acids, carl | C21330000                                                                | C12 H16    | + | 11.45 | 2.15E+07 | 161.1325 | 161.1316 | 159.1161,145.1008,119.0849,105.0693,91.0538                  |
| 193 | 112 | 2544 | phenolic acids, carl | Butylthiathalide                                                         | C12 H14 O2 | + | 8.88  | 8.63E+06 | 191.1067 | 191.1058 | 145.1004,91.0537                                             |
| 194 | 113 | 2545 | phenolic acids, carl | 4-Phenylcyclohexanone                                                    | C12 H14 O  | + | 9.86  | 4.33E+06 | 175.1117 | 175.1109 | 147.1160,133.1004,119.0849,91.0537                           |
| 195 | 114 | 2572 | phenolic acids, carl | (3S,4R)-3-(1-(4-hydroxyhexyl)-4-(hydroxymethyl)oxolan-2-yl)butanoic acid | C11 H20 O4 | + | 10.56 | 1.91E+07 | 217.1434 | 217.1425 | 181.1214,155.0697,111.0435                                   |
| 196 | 115 | 2605 | phenolic acids, carl | Ethyl 3-cyclohexyl-3-oxopropionate                                       | C11 H18 O5 | + | 10.24 | 2.27E+07 | 199.1328 | 199.1319 | 159.0747,111.0797                                            |
| 197 | 116 | 2619 | phenolic acids, carl | 3422                                                                     | C11 H18 O  | + | 13.99 | 2.55E+06 | 167.1430 | 167.1424 | 121.0641,95.0486,67.0538                                     |
| 198 | 117 | 2663 | phenolic acids, carl | 5-Pentylresorcinol                                                       | C11 H16 O2 | + | 9.30  | 5.20E+08 | 181.1223 | 181.1220 | 163.1108,125.0590,111.0799,107.0486,95.0486                  |
| 199 | 118 | 2669 | phenolic acids, carl | SM675000                                                                 | C11 H16 O  | + | 10.81 | 8.32E+06 | 165.1274 | 165.1267 | 147.1161,91.0538,77.0382                                     |
| 200 | 119 | 2684 | phenolic acids, carl | Butylparaben                                                             | C11 H14 O3 | + | 9.60  | 1.07E+08 | 195.1016 | 195.1007 | 177.0901,149.0954,95.0487,79.0538                            |
| 201 | 120 | 2686 | phenolic acids, carl | 2-Isopropyl-5-methylbenzoic acid                                         | C11 H14 O2 | + | 14.08 | 3.96E+07 | 179.1067 | 179.1059 | 161.0952,137.0589,133.1004,105.0693,91.0537,77.0381          |
| 202 | 121 | 2687 | phenolic acids, carl | Butyl benzoate                                                           | C11 H14 O2 | + | 9.00  | 2.51E+07 | 179.1067 | 179.1057 | 133.1004,105.0693                                            |
| 203 | 122 | 2698 | phenolic acids, carl | 1-Phenyl-2-nentanone                                                     | C11 H14 O  | + | 10.24 | 1.37E+07 | 163.1117 | 163.1109 | 135.0797,105.0330,77.0381                                    |
| 204 | 123 | 2708 | phenolic acids, carl | 6-METHYLTETRALIN                                                         | C11 H14    | + | 11.44 | 2.16E+07 | 147.1168 | 147.1160 | 145.1004,119.0849,105.0693,91.0537                           |
| 205 | 124 | 2736 | phenolic acids, carl | 4-Methyl-1-Tetralone                                                     | C11 H12 O  | + | 12.28 | 4.75E+06 | 161.0961 | 161.0952 | 133.1004,119.0849,91.0537,77.0382                            |
| 206 | 125 | 2773 | phenolic acids, carl | Sedacac acid                                                             | C10 H18 O4 | + | 9.69  | 8.95E+06 | 203.1218 | 203.1209 | 121.0006,95.0851,81.0695,67.0539                             |
| 207 | 126 | 2800 | phenolic acids, carl | Ethyl 2-oxocycloheptanecarboxylate                                       | C10 H16 O3 | + | 10.56 | 1.44E+07 | 185.1172 | 185.1163 | 139.0746,111.0798,85.0643,57.0696                            |
| 208 | 127 | 2801 | phenolic acids, carl | Mossao lactone                                                           | C10 H16 O2 | + | 8.30  | 2.28E+07 | 169.1223 | 169.1215 | 151.1110,123.1162,69.0696                                    |
| 209 | 128 | 2827 | phenolic acids, carl | Guaiifenesin                                                             | C10 H14 O4 | + | 8.41  | 2.69E+06 | 199.0965 | 199.0957 | 184.0720,168.0772,153.0538,125.0590,95.0487,79.0538          |
| 210 | 129 | 2836 | phenolic acids, carl | 6-Pentyl-2H-pyran-2-one                                                  | C10 H14 O2 | + | 8.84  | 3.43E+06 | 167.1067 | 167.1058 | 149.0953,138.0542,121.1006,107.0850,95.0487                  |
| 211 | 130 | 2856 | phenolic acids, carl | p-cymene                                                                 | C10 H14    | + | 9.31  | 8.45E+06 | 135.1168 | 135.1161 | 93.0694                                                      |
| 212 | 131 | 2879 | phenolic acids, carl | 3,4'-Dimethylacetophenone                                                | C10 H12 O3 | + | 9.55  | 6.25E+07 | 181.0859 | 181.0852 | 135.0433,133.0640,123.0433,95.0486,79.0538                   |
| 213 | 132 | 2880 | phenolic acids, carl | 4-Phenylbutyric acid                                                     | C10 H12 O2 | + | 14.89 | 1.00E+07 | 165.0910 | 165.0901 | 137.0954,122.0730,119.0849,107.0486,91.0537,77.0381          |
| 214 | 133 | 2884 | phenolic acids, carl | Butyrophenone                                                            | C10 H12 O  | + | 8.88  | 4.73E+06 | 149.10   | 149.10   | 105.0694,103.0536,95.0487,91.0538                            |
| 215 | 134 | 2895 | phenolic acids, carl | 2-ISOPROPENYL TOLUENE                                                    | C10 H12    | + | 9.09  | 4.57E+07 | 133.1012 | 133.1004 | 131.0848,117.0692,105.0693,91.0537,77.0382                   |

| EA site | Compound card Name | formular | Ion model                                                                                                                                                                                                                                                                                                                                                                                                                                                                                                                                                                                                                                                                                                                                                                                                                                                                                                                                                                                                                                                                                                                                                                                                                                                                                                                                                                                                                                                                                                                                                                                                                                                                                                                                                                                                                                                                                                                                                                                                                                                                                                                                                                                                                                                                                                                                                                                                                                                                                                                                                                                                                                                                                                                                                                                                                                                                                                                                                                                                                                                                                                                                                                                                                                                                                                                                                                                                                                                                                                                                                                                                                                                                                                                                                                                                                                                                                                                                                                                                                                                                                                                                                                                                                                                                                                                                                                                                                                                                                                                                                                                                                                                                                                                                                                                                                                                                                                                                                                                                                                                                                                                                                                                                                                                                                                                                                                                                                                                                                                                                                                                                                                                                                                                                                                                                                                                                                                                                                                                                                                                                                                                                                                                                                                                                                                                                                                                                                                                                                                                                                                                                                                                                                                                                                                                                                                                                                                                                                                                                                                                                                                                                                                                                                                                                                                                                                                                                                                                                                                                                                       | RT         | Response | theoretical value | Measured value | MS/MS     |
|---------|--------------------|----------|-----------------------------------------------------------------------------------------------------------------------------------------------------------------------------------------------------------------------------------------------------------------------------------------------------------------------------------------------------------------------------------------------------------------------------------------------------------------------------------------------------------------------------------------------------------------------------------------------------------------------------------------------------------------------------------------------------------------------------------------------------------------------------------------------------------------------------------------------------------------------------------------------------------------------------------------------------------------------------------------------------------------------------------------------------------------------------------------------------------------------------------------------------------------------------------------------------------------------------------------------------------------------------------------------------------------------------------------------------------------------------------------------------------------------------------------------------------------------------------------------------------------------------------------------------------------------------------------------------------------------------------------------------------------------------------------------------------------------------------------------------------------------------------------------------------------------------------------------------------------------------------------------------------------------------------------------------------------------------------------------------------------------------------------------------------------------------------------------------------------------------------------------------------------------------------------------------------------------------------------------------------------------------------------------------------------------------------------------------------------------------------------------------------------------------------------------------------------------------------------------------------------------------------------------------------------------------------------------------------------------------------------------------------------------------------------------------------------------------------------------------------------------------------------------------------------------------------------------------------------------------------------------------------------------------------------------------------------------------------------------------------------------------------------------------------------------------------------------------------------------------------------------------------------------------------------------------------------------------------------------------------------------------------------------------------------------------------------------------------------------------------------------------------------------------------------------------------------------------------------------------------------------------------------------------------------------------------------------------------------------------------------------------------------------------------------------------------------------------------------------------------------------------------------------------------------------------------------------------------------------------------------------------------------------------------------------------------------------------------------------------------------------------------------------------------------------------------------------------------------------------------------------------------------------------------------------------------------------------------------------------------------------------------------------------------------------------------------------------------------------------------------------------------------------------------------------------------------------------------------------------------------------------------------------------------------------------------------------------------------------------------------------------------------------------------------------------------------------------------------------------------------------------------------------------------------------------------------------------------------------------------------------------------------------------------------------------------------------------------------------------------------------------------------------------------------------------------------------------------------------------------------------------------------------------------------------------------------------------------------------------------------------------------------------------------------------------------------------------------------------------------------------------------------------------------------------------------------------------------------------------------------------------------------------------------------------------------------------------------------------------------------------------------------------------------------------------------------------------------------------------------------------------------------------------------------------------------------------------------------------------------------------------------------------------------------------------------------------------------------------------------------------------------------------------------------------------------------------------------------------------------------------------------------------------------------------------------------------------------------------------------------------------------------------------------------------------------------------------------------------------------------------------------------------------------------------------------------------------------------------------------------------------------------------------------------------------------------------------------------------------------------------------------------------------------------------------------------------------------------------------------------------------------------------------------------------------------------------------------------------------------------------------------------------------------------------------------------------------------------------------------------------------------------------------------------------------------------------------------------------------------------------------------------------------------------------------------------------------------------------------------------------------------------------------------------------------------------------------------------------------------------------------------------------------------------------------------------------------------------------------------------------------------------------------------------|------------|----------|-------------------|----------------|-----------|
| 1       | 16                 | 1        | phenylpropanoic acid, 4-Coumaric acid                                                                                                                                                                                                                                                                                                                                                                                                                                                                                                                                                                                                                                                                                                                                                                                                                                                                                                                                                                                                                                                                                                                                                                                                                                                                                                                                                                                                                                                                                                                                                                                                                                                                                                                                                                                                                                                                                                                                                                                                                                                                                                                                                                                                                                                                                                                                                                                                                                                                                                                                                                                                                                                                                                                                                                                                                                                                                                                                                                                                                                                                                                                                                                                                                                                                                                                                                                                                                                                                                                                                                                                                                                                                                                                                                                                                                                                                                                                                                                                                                                                                                                                                                                                                                                                                                                                                                                                                                                                                                                                                                                                                                                                                                                                                                                                                                                                                                                                                                                                                                                                                                                                                                                                                                                                                                                                                                                                                                                                                                                                                                                                                                                                                                                                                                                                                                                                                                                                                                                                                                                                                                                                                                                                                                                                                                                                                                                                                                                                                                                                                                                                                                                                                                                                                                                                                                                                                                                                                                                                                                                                                                                                                                                                                                                                                                                                                                                                                                                                                                                                           | C9 H8 O3   | + 5.97   | 7.66E+06          | 165.0546       | 165.0538  |
| 2       | 18                 | 2        | phenylpropanoic acid, Cinnamic acid                                                                                                                                                                                                                                                                                                                                                                                                                                                                                                                                                                                                                                                                                                                                                                                                                                                                                                                                                                                                                                                                                                                                                                                                                                                                                                                                                                                                                                                                                                                                                                                                                                                                                                                                                                                                                                                                                                                                                                                                                                                                                                                                                                                                                                                                                                                                                                                                                                                                                                                                                                                                                                                                                                                                                                                                                                                                                                                                                                                                                                                                                                                                                                                                                                                                                                                                                                                                                                                                                                                                                                                                                                                                                                                                                                                                                                                                                                                                                                                                                                                                                                                                                                                                                                                                                                                                                                                                                                                                                                                                                                                                                                                                                                                                                                                                                                                                                                                                                                                                                                                                                                                                                                                                                                                                                                                                                                                                                                                                                                                                                                                                                                                                                                                                                                                                                                                                                                                                                                                                                                                                                                                                                                                                                                                                                                                                                                                                                                                                                                                                                                                                                                                                                                                                                                                                                                                                                                                                                                                                                                                                                                                                                                                                                                                                                                                                                                                                                                                                                                                             | C9 H8 O2   | + 9.83   | 1.52E+06          | 149.0591       | 149.0591  |
| 3       | 21                 | 3        | phenylpropanoic acid, trans-Cinnamaldehyde                                                                                                                                                                                                                                                                                                                                                                                                                                                                                                                                                                                                                                                                                                                                                                                                                                                                                                                                                                                                                                                                                                                                                                                                                                                                                                                                                                                                                                                                                                                                                                                                                                                                                                                                                                                                                                                                                                                                                                                                                                                                                                                                                                                                                                                                                                                                                                                                                                                                                                                                                                                                                                                                                                                                                                                                                                                                                                                                                                                                                                                                                                                                                                                                                                                                                                                                                                                                                                                                                                                                                                                                                                                                                                                                                                                                                                                                                                                                                                                                                                                                                                                                                                                                                                                                                                                                                                                                                                                                                                                                                                                                                                                                                                                                                                                                                                                                                                                                                                                                                                                                                                                                                                                                                                                                                                                                                                                                                                                                                                                                                                                                                                                                                                                                                                                                                                                                                                                                                                                                                                                                                                                                                                                                                                                                                                                                                                                                                                                                                                                                                                                                                                                                                                                                                                                                                                                                                                                                                                                                                                                                                                                                                                                                                                                                                                                                                                                                                                                                                                                      | C9 H8 O    | + 7.74   | 1.93E+06          | 133.0648       | 133.0642  |
| 4       | 25                 | 4        | phenylpropanoic acid, 3,5,7-Trihydroxy-4H-chromen-4-one                                                                                                                                                                                                                                                                                                                                                                                                                                                                                                                                                                                                                                                                                                                                                                                                                                                                                                                                                                                                                                                                                                                                                                                                                                                                                                                                                                                                                                                                                                                                                                                                                                                                                                                                                                                                                                                                                                                                                                                                                                                                                                                                                                                                                                                                                                                                                                                                                                                                                                                                                                                                                                                                                                                                                                                                                                                                                                                                                                                                                                                                                                                                                                                                                                                                                                                                                                                                                                                                                                                                                                                                                                                                                                                                                                                                                                                                                                                                                                                                                                                                                                                                                                                                                                                                                                                                                                                                                                                                                                                                                                                                                                                                                                                                                                                                                                                                                                                                                                                                                                                                                                                                                                                                                                                                                                                                                                                                                                                                                                                                                                                                                                                                                                                                                                                                                                                                                                                                                                                                                                                                                                                                                                                                                                                                                                                                                                                                                                                                                                                                                                                                                                                                                                                                                                                                                                                                                                                                                                                                                                                                                                                                                                                                                                                                                                                                                                                                                                                                                                         | C9 H6 O5   | + 3.66   | 8.26E+06          | 195.0288       | 195.0279  |
| 5       | 30                 | 5        | phenylpropanoic acid, 5-Hydroxy-1-benzofuran-2-carboxylic acid                                                                                                                                                                                                                                                                                                                                                                                                                                                                                                                                                                                                                                                                                                                                                                                                                                                                                                                                                                                                                                                                                                                                                                                                                                                                                                                                                                                                                                                                                                                                                                                                                                                                                                                                                                                                                                                                                                                                                                                                                                                                                                                                                                                                                                                                                                                                                                                                                                                                                                                                                                                                                                                                                                                                                                                                                                                                                                                                                                                                                                                                                                                                                                                                                                                                                                                                                                                                                                                                                                                                                                                                                                                                                                                                                                                                                                                                                                                                                                                                                                                                                                                                                                                                                                                                                                                                                                                                                                                                                                                                                                                                                                                                                                                                                                                                                                                                                                                                                                                                                                                                                                                                                                                                                                                                                                                                                                                                                                                                                                                                                                                                                                                                                                                                                                                                                                                                                                                                                                                                                                                                                                                                                                                                                                                                                                                                                                                                                                                                                                                                                                                                                                                                                                                                                                                                                                                                                                                                                                                                                                                                                                                                                                                                                                                                                                                                                                                                                                                                                                  | C9 H6 O4   | + 3.45   | 5.01E+07          | 179.0339       | 179.0330  |
| 6       | 32                 | 6        | phenylpropanoic acid, H2O458                                                                                                                                                                                                                                                                                                                                                                                                                                                                                                                                                                                                                                                                                                                                                                                                                                                                                                                                                                                                                                                                                                                                                                                                                                                                                                                                                                                                                                                                                                                                                                                                                                                                                                                                                                                                                                                                                                                                                                                                                                                                                                                                                                                                                                                                                                                                                                                                                                                                                                                                                                                                                                                                                                                                                                                                                                                                                                                                                                                                                                                                                                                                                                                                                                                                                                                                                                                                                                                                                                                                                                                                                                                                                                                                                                                                                                                                                                                                                                                                                                                                                                                                                                                                                                                                                                                                                                                                                                                                                                                                                                                                                                                                                                                                                                                                                                                                                                                                                                                                                                                                                                                                                                                                                                                                                                                                                                                                                                                                                                                                                                                                                                                                                                                                                                                                                                                                                                                                                                                                                                                                                                                                                                                                                                                                                                                                                                                                                                                                                                                                                                                                                                                                                                                                                                                                                                                                                                                                                                                                                                                                                                                                                                                                                                                                                                                                                                                                                                                                                                                                    | C9 H6 O3   | + 12.91  | 4.38E+07          | 163.0390       | 163.0381  |
| 7       | 36                 | 7        | Coumarin                                                                                                                                                                                                                                                                                                                                                                                                                                                                                                                                                                                                                                                                                                                                                                                                                                                                                                                                                                                                                                                                                                                                                                                                                                                                                                                                                                                                                                                                                                                                                                                                                                                                                                                                                                                                                                                                                                                                                                                                                                                                                                                                                                                                                                                                                                                                                                                                                                                                                                                                                                                                                                                                                                                                                                                                                                                                                                                                                                                                                                                                                                                                                                                                                                                                                                                                                                                                                                                                                                                                                                                                                                                                                                                                                                                                                                                                                                                                                                                                                                                                                                                                                                                                                                                                                                                                                                                                                                                                                                                                                                                                                                                                                                                                                                                                                                                                                                                                                                                                                                                                                                                                                                                                                                                                                                                                                                                                                                                                                                                                                                                                                                                                                                                                                                                                                                                                                                                                                                                                                                                                                                                                                                                                                                                                                                                                                                                                                                                                                                                                                                                                                                                                                                                                                                                                                                                                                                                                                                                                                                                                                                                                                                                                                                                                                                                                                                                                                                                                                                                                                        | C9 H6 O2   | + 6.29   | 1.47E+07          | 147.0441       | 147.0436  |
| 8       | 92                 | 8        | phenylpropanoic acid, 3-Phenyl-1-propanol                                                                                                                                                                                                                                                                                                                                                                                                                                                                                                                                                                                                                                                                                                                                                                                                                                                                                                                                                                                                                                                                                                                                                                                                                                                                                                                                                                                                                                                                                                                                                                                                                                                                                                                                                                                                                                                                                                                                                                                                                                                                                                                                                                                                                                                                                                                                                                                                                                                                                                                                                                                                                                                                                                                                                                                                                                                                                                                                                                                                                                                                                                                                                                                                                                                                                                                                                                                                                                                                                                                                                                                                                                                                                                                                                                                                                                                                                                                                                                                                                                                                                                                                                                                                                                                                                                                                                                                                                                                                                                                                                                                                                                                                                                                                                                                                                                                                                                                                                                                                                                                                                                                                                                                                                                                                                                                                                                                                                                                                                                                                                                                                                                                                                                                                                                                                                                                                                                                                                                                                                                                                                                                                                                                                                                                                                                                                                                                                                                                                                                                                                                                                                                                                                                                                                                                                                                                                                                                                                                                                                                                                                                                                                                                                                                                                                                                                                                                                                                                                                                                       | C9 H12 O   | + 9.09   | 2.90E+07          | 137.0961       | 137.0954  |
| 9       | 1907               | 9        | phenylpropanoic acid, isopentyl citrate                                                                                                                                                                                                                                                                                                                                                                                                                                                                                                                                                                                                                                                                                                                                                                                                                                                                                                                                                                                                                                                                                                                                                                                                                                                                                                                                                                                                                                                                                                                                                                                                                                                                                                                                                                                                                                                                                                                                                                                                                                                                                                                                                                                                                                                                                                                                                                                                                                                                                                                                                                                                                                                                                                                                                                                                                                                                                                                                                                                                                                                                                                                                                                                                                                                                                                                                                                                                                                                                                                                                                                                                                                                                                                                                                                                                                                                                                                                                                                                                                                                                                                                                                                                                                                                                                                                                                                                                                                                                                                                                                                                                                                                                                                                                                                                                                                                                                                                                                                                                                                                                                                                                                                                                                                                                                                                                                                                                                                                                                                                                                                                                                                                                                                                                                                                                                                                                                                                                                                                                                                                                                                                                                                                                                                                                                                                                                                                                                                                                                                                                                                                                                                                                                                                                                                                                                                                                                                                                                                                                                                                                                                                                                                                                                                                                                                                                                                                                                                                                                                                         | C14 H18 O2 | + 9.22   | 9.48E+06          | 219.1380       | 219.1371  |
| 10      | 1931               | 10       | phenylpropanoic acid, cinnamyl tiglate                                                                                                                                                                                                                                                                                                                                                                                                                                                                                                                                                                                                                                                                                                                                                                                                                                                                                                                                                                                                                                                                                                                                                                                                                                                                                                                                                                                                                                                                                                                                                                                                                                                                                                                                                                                                                                                                                                                                                                                                                                                                                                                                                                                                                                                                                                                                                                                                                                                                                                                                                                                                                                                                                                                                                                                                                                                                                                                                                                                                                                                                                                                                                                                                                                                                                                                                                                                                                                                                                                                                                                                                                                                                                                                                                                                                                                                                                                                                                                                                                                                                                                                                                                                                                                                                                                                                                                                                                                                                                                                                                                                                                                                                                                                                                                                                                                                                                                                                                                                                                                                                                                                                                                                                                                                                                                                                                                                                                                                                                                                                                                                                                                                                                                                                                                                                                                                                                                                                                                                                                                                                                                                                                                                                                                                                                                                                                                                                                                                                                                                                                                                                                                                                                                                                                                                                                                                                                                                                                                                                                                                                                                                                                                                                                                                                                                                                                                                                                                                                                                                          | C14 H16 O2 | + 8.40   | 9.10E+06          | 217.1223       | 217.1215  |
| 11      | 1935               | 11       | phenylpropanoic acid, 2,3-Di-2-hydroxypropyl-2-yl-2H-3H-7-furo[3,2-b]pyran-3-ol                                                                                                                                                                                                                                                                                                                                                                                                                                                                                                                                                                                                                                                                                                                                                                                                                                                                                                                                                                                                                                                                                                                                                                                                                                                                                                                                                                                                                                                                                                                                                                                                                                                                                                                                                                                                                                                                                                                                                                                                                                                                                                                                                                                                                                                                                                                                                                                                                                                                                                                                                                                                                                                                                                                                                                                                                                                                                                                                                                                                                                                                                                                                                                                                                                                                                                                                                                                                                                                                                                                                                                                                                                                                                                                                                                                                                                                                                                                                                                                                                                                                                                                                                                                                                                                                                                                                                                                                                                                                                                                                                                                                                                                                                                                                                                                                                                                                                                                                                                                                                                                                                                                                                                                                                                                                                                                                                                                                                                                                                                                                                                                                                                                                                                                                                                                                                                                                                                                                                                                                                                                                                                                                                                                                                                                                                                                                                                                                                                                                                                                                                                                                                                                                                                                                                                                                                                                                                                                                                                                                                                                                                                                                                                                                                                                                                                                                                                                                                                                                                 | C18 H24 O5 | + 18.65  | 2.75E+07          | 381.1655       | 381.1647  |
| 12      | 1946               | 12       | phenylpropanoic acid, 8,8-dimethyl-2H-B-pyrano[3,2-g]chromen-2-one                                                                                                                                                                                                                                                                                                                                                                                                                                                                                                                                                                                                                                                                                                                                                                                                                                                                                                                                                                                                                                                                                                                                                                                                                                                                                                                                                                                                                                                                                                                                                                                                                                                                                                                                                                                                                                                                                                                                                                                                                                                                                                                                                                                                                                                                                                                                                                                                                                                                                                                                                                                                                                                                                                                                                                                                                                                                                                                                                                                                                                                                                                                                                                                                                                                                                                                                                                                                                                                                                                                                                                                                                                                                                                                                                                                                                                                                                                                                                                                                                                                                                                                                                                                                                                                                                                                                                                                                                                                                                                                                                                                                                                                                                                                                                                                                                                                                                                                                                                                                                                                                                                                                                                                                                                                                                                                                                                                                                                                                                                                                                                                                                                                                                                                                                                                                                                                                                                                                                                                                                                                                                                                                                                                                                                                                                                                                                                                                                                                                                                                                                                                                                                                                                                                                                                                                                                                                                                                                                                                                                                                                                                                                                                                                                                                                                                                                                                                                                                                                                              | C14 H12 O3 | + 10.80  | 2.64E+07          | 229.0859       | 229.0851  |
| 13      | 2114               | 13       | phenylpropanoic acid, 5,6,7,8-Tetramethoxycoumarin                                                                                                                                                                                                                                                                                                                                                                                                                                                                                                                                                                                                                                                                                                                                                                                                                                                                                                                                                                                                                                                                                                                                                                                                                                                                                                                                                                                                                                                                                                                                                                                                                                                                                                                                                                                                                                                                                                                                                                                                                                                                                                                                                                                                                                                                                                                                                                                                                                                                                                                                                                                                                                                                                                                                                                                                                                                                                                                                                                                                                                                                                                                                                                                                                                                                                                                                                                                                                                                                                                                                                                                                                                                                                                                                                                                                                                                                                                                                                                                                                                                                                                                                                                                                                                                                                                                                                                                                                                                                                                                                                                                                                                                                                                                                                                                                                                                                                                                                                                                                                                                                                                                                                                                                                                                                                                                                                                                                                                                                                                                                                                                                                                                                                                                                                                                                                                                                                                                                                                                                                                                                                                                                                                                                                                                                                                                                                                                                                                                                                                                                                                                                                                                                                                                                                                                                                                                                                                                                                                                                                                                                                                                                                                                                                                                                                                                                                                                                                                                                                                              | C14 H16 O4 | + 4.62   | 1.60E+06          | 267.0863       | 267.0855  |
| 14      | 2133               | 14       | phenylpropanoic acid, (6-Oxo-6H-1-[3,1]oxolol[4,5-g]chromen-8-yl)acetate                                                                                                                                                                                                                                                                                                                                                                                                                                                                                                                                                                                                                                                                                                                                                                                                                                                                                                                                                                                                                                                                                                                                                                                                                                                                                                                                                                                                                                                                                                                                                                                                                                                                                                                                                                                                                                                                                                                                                                                                                                                                                                                                                                                                                                                                                                                                                                                                                                                                                                                                                                                                                                                                                                                                                                                                                                                                                                                                                                                                                                                                                                                                                                                                                                                                                                                                                                                                                                                                                                                                                                                                                                                                                                                                                                                                                                                                                                                                                                                                                                                                                                                                                                                                                                                                                                                                                                                                                                                                                                                                                                                                                                                                                                                                                                                                                                                                                                                                                                                                                                                                                                                                                                                                                                                                                                                                                                                                                                                                                                                                                                                                                                                                                                                                                                                                                                                                                                                                                                                                                                                                                                                                                                                                                                                                                                                                                                                                                                                                                                                                                                                                                                                                                                                                                                                                                                                                                                                                                                                                                                                                                                                                                                                                                                                                                                                                                                                                                                                                                        | C12 H8 O6  | + 3.66   | 8.99E+06          | 249.0394       | 249.0381  |
| 15      | 2134               | 15       | phenylpropanoic acid, Berigapten                                                                                                                                                                                                                                                                                                                                                                                                                                                                                                                                                                                                                                                                                                                                                                                                                                                                                                                                                                                                                                                                                                                                                                                                                                                                                                                                                                                                                                                                                                                                                                                                                                                                                                                                                                                                                                                                                                                                                                                                                                                                                                                                                                                                                                                                                                                                                                                                                                                                                                                                                                                                                                                                                                                                                                                                                                                                                                                                                                                                                                                                                                                                                                                                                                                                                                                                                                                                                                                                                                                                                                                                                                                                                                                                                                                                                                                                                                                                                                                                                                                                                                                                                                                                                                                                                                                                                                                                                                                                                                                                                                                                                                                                                                                                                                                                                                                                                                                                                                                                                                                                                                                                                                                                                                                                                                                                                                                                                                                                                                                                                                                                                                                                                                                                                                                                                                                                                                                                                                                                                                                                                                                                                                                                                                                                                                                                                                                                                                                                                                                                                                                                                                                                                                                                                                                                                                                                                                                                                                                                                                                                                                                                                                                                                                                                                                                                                                                                                                                                                                                                | C12 H8 O4  | + 7.71   | 2.71E+07          | 217.0495       | 217.0489  |
| 16      | 2254               | 16       | phenylpropanoic acid, Asarone                                                                                                                                                                                                                                                                                                                                                                                                                                                                                                                                                                                                                                                                                                                                                                                                                                                                                                                                                                                                                                                                                                                                                                                                                                                                                                                                                                                                                                                                                                                                                                                                                                                                                                                                                                                                                                                                                                                                                                                                                                                                                                                                                                                                                                                                                                                                                                                                                                                                                                                                                                                                                                                                                                                                                                                                                                                                                                                                                                                                                                                                                                                                                                                                                                                                                                                                                                                                                                                                                                                                                                                                                                                                                                                                                                                                                                                                                                                                                                                                                                                                                                                                                                                                                                                                                                                                                                                                                                                                                                                                                                                                                                                                                                                                                                                                                                                                                                                                                                                                                                                                                                                                                                                                                                                                                                                                                                                                                                                                                                                                                                                                                                                                                                                                                                                                                                                                                                                                                                                                                                                                                                                                                                                                                                                                                                                                                                                                                                                                                                                                                                                                                                                                                                                                                                                                                                                                                                                                                                                                                                                                                                                                                                                                                                                                                                                                                                                                                                                                                                                                   | C12 H16 O3 | + 9.07   | 3.62E+07          | 209.1172       | 209.1164  |
| 17      | 2318               | 17       | phenylpropanoic acid, 6,7,8-trimethoxy-2H-chromen-2-one                                                                                                                                                                                                                                                                                                                                                                                                                                                                                                                                                                                                                                                                                                                                                                                                                                                                                                                                                                                                                                                                                                                                                                                                                                                                                                                                                                                                                                                                                                                                                                                                                                                                                                                                                                                                                                                                                                                                                                                                                                                                                                                                                                                                                                                                                                                                                                                                                                                                                                                                                                                                                                                                                                                                                                                                                                                                                                                                                                                                                                                                                                                                                                                                                                                                                                                                                                                                                                                                                                                                                                                                                                                                                                                                                                                                                                                                                                                                                                                                                                                                                                                                                                                                                                                                                                                                                                                                                                                                                                                                                                                                                                                                                                                                                                                                                                                                                                                                                                                                                                                                                                                                                                                                                                                                                                                                                                                                                                                                                                                                                                                                                                                                                                                                                                                                                                                                                                                                                                                                                                                                                                                                                                                                                                                                                                                                                                                                                                                                                                                                                                                                                                                                                                                                                                                                                                                                                                                                                                                                                                                                                                                                                                                                                                                                                                                                                                                                                                                                                                         | C12 H12 O5 | + 7.97   | 1.85E+07          | 237.0758       | 237.0747  |
| 18      | 2338               | 18       | phenylpropanoic acid, 6,7-Dihydrocoumarin-4-acetic acid                                                                                                                                                                                                                                                                                                                                                                                                                                                                                                                                                                                                                                                                                                                                                                                                                                                                                                                                                                                                                                                                                                                                                                                                                                                                                                                                                                                                                                                                                                                                                                                                                                                                                                                                                                                                                                                                                                                                                                                                                                                                                                                                                                                                                                                                                                                                                                                                                                                                                                                                                                                                                                                                                                                                                                                                                                                                                                                                                                                                                                                                                                                                                                                                                                                                                                                                                                                                                                                                                                                                                                                                                                                                                                                                                                                                                                                                                                                                                                                                                                                                                                                                                                                                                                                                                                                                                                                                                                                                                                                                                                                                                                                                                                                                                                                                                                                                                                                                                                                                                                                                                                                                                                                                                                                                                                                                                                                                                                                                                                                                                                                                                                                                                                                                                                                                                                                                                                                                                                                                                                                                                                                                                                                                                                                                                                                                                                                                                                                                                                                                                                                                                                                                                                                                                                                                                                                                                                                                                                                                                                                                                                                                                                                                                                                                                                                                                                                                                                                                                                         | C11 H8 O6  | + 3.66   | 1.63E+07          | 237.0394       | 237.0383  |
| 19      | 2456               | 19       | phenylpropanoic acid, NP-014891                                                                                                                                                                                                                                                                                                                                                                                                                                                                                                                                                                                                                                                                                                                                                                                                                                                                                                                                                                                                                                                                                                                                                                                                                                                                                                                                                                                                                                                                                                                                                                                                                                                                                                                                                                                                                                                                                                                                                                                                                                                                                                                                                                                                                                                                                                                                                                                                                                                                                                                                                                                                                                                                                                                                                                                                                                                                                                                                                                                                                                                                                                                                                                                                                                                                                                                                                                                                                                                                                                                                                                                                                                                                                                                                                                                                                                                                                                                                                                                                                                                                                                                                                                                                                                                                                                                                                                                                                                                                                                                                                                                                                                                                                                                                                                                                                                                                                                                                                                                                                                                                                                                                                                                                                                                                                                                                                                                                                                                                                                                                                                                                                                                                                                                                                                                                                                                                                                                                                                                                                                                                                                                                                                                                                                                                                                                                                                                                                                                                                                                                                                                                                                                                                                                                                                                                                                                                                                                                                                                                                                                                                                                                                                                                                                                                                                                                                                                                                                                                                                                                 | C11 H14 O3 | + 6.45   | 7.77E+07          | 195.1018       | 195.1006  |
| 20      | 2505               | 20       | phenylpropanoic acid, Ethyl cinnamate                                                                                                                                                                                                                                                                                                                                                                                                                                                                                                                                                                                                                                                                                                                                                                                                                                                                                                                                                                                                                                                                                                                                                                                                                                                                                                                                                                                                                                                                                                                                                                                                                                                                                                                                                                                                                                                                                                                                                                                                                                                                                                                                                                                                                                                                                                                                                                                                                                                                                                                                                                                                                                                                                                                                                                                                                                                                                                                                                                                                                                                                                                                                                                                                                                                                                                                                                                                                                                                                                                                                                                                                                                                                                                                                                                                                                                                                                                                                                                                                                                                                                                                                                                                                                                                                                                                                                                                                                                                                                                                                                                                                                                                                                                                                                                                                                                                                                                                                                                                                                                                                                                                                                                                                                                                                                                                                                                                                                                                                                                                                                                                                                                                                                                                                                                                                                                                                                                                                                                                                                                                                                                                                                                                                                                                                                                                                                                                                                                                                                                                                                                                                                                                                                                                                                                                                                                                                                                                                                                                                                                                                                                                                                                                                                                                                                                                                                                                                                                                                                                                           | C11 H12 O2 | + 6.45   | 8.04E+06          | 177.0910       | 177.0902  |
| 21      | 2517               | 21       | phenylpropanoic acid, Scoparone                                                                                                                                                                                                                                                                                                                                                                                                                                                                                                                                                                                                                                                                                                                                                                                                                                                                                                                                                                                                                                                                                                                                                                                                                                                                                                                                                                                                                                                                                                                                                                                                                                                                                                                                                                                                                                                                                                                                                                                                                                                                                                                                                                                                                                                                                                                                                                                                                                                                                                                                                                                                                                                                                                                                                                                                                                                                                                                                                                                                                                                                                                                                                                                                                                                                                                                                                                                                                                                                                                                                                                                                                                                                                                                                                                                                                                                                                                                                                                                                                                                                                                                                                                                                                                                                                                                                                                                                                                                                                                                                                                                                                                                                                                                                                                                                                                                                                                                                                                                                                                                                                                                                                                                                                                                                                                                                                                                                                                                                                                                                                                                                                                                                                                                                                                                                                                                                                                                                                                                                                                                                                                                                                                                                                                                                                                                                                                                                                                                                                                                                                                                                                                                                                                                                                                                                                                                                                                                                                                                                                                                                                                                                                                                                                                                                                                                                                                                                                                                                                                                                 | C11 H10 O4 | + 7.35   | 8.41E+07          | 207.0652       | 207.0644  |
| 22      | 2528               | 22       | phenylpropanoic acid, Fraxetin                                                                                                                                                                                                                                                                                                                                                                                                                                                                                                                                                                                                                                                                                                                                                                                                                                                                                                                                                                                                                                                                                                                                                                                                                                                                                                                                                                                                                                                                                                                                                                                                                                                                                                                                                                                                                                                                                                                                                                                                                                                                                                                                                                                                                                                                                                                                                                                                                                                                                                                                                                                                                                                                                                                                                                                                                                                                                                                                                                                                                                                                                                                                                                                                                                                                                                                                                                                                                                                                                                                                                                                                                                                                                                                                                                                                                                                                                                                                                                                                                                                                                                                                                                                                                                                                                                                                                                                                                                                                                                                                                                                                                                                                                                                                                                                                                                                                                                                                                                                                                                                                                                                                                                                                                                                                                                                                                                                                                                                                                                                                                                                                                                                                                                                                                                                                                                                                                                                                                                                                                                                                                                                                                                                                                                                                                                                                                                                                                                                                                                                                                                                                                                                                                                                                                                                                                                                                                                                                                                                                                                                                                                                                                                                                                                                                                                                                                                                                                                                                                                                                  | C10 H8 O5  | + 4.59   | 8.61E+07          | 209.0444       | 209.0437  |
| 23      | 2534               | 23       | phenylpropanoic acid, Scopoletin                                                                                                                                                                                                                                                                                                                                                                                                                                                                                                                                                                                                                                                                                                                                                                                                                                                                                                                                                                                                                                                                                                                                                                                                                                                                                                                                                                                                                                                                                                                                                                                                                                                                                                                                                                                                                                                                                                                                                                                                                                                                                                                                                                                                                                                                                                                                                                                                                                                                                                                                                                                                                                                                                                                                                                                                                                                                                                                                                                                                                                                                                                                                                                                                                                                                                                                                                                                                                                                                                                                                                                                                                                                                                                                                                                                                                                                                                                                                                                                                                                                                                                                                                                                                                                                                                                                                                                                                                                                                                                                                                                                                                                                                                                                                                                                                                                                                                                                                                                                                                                                                                                                                                                                                                                                                                                                                                                                                                                                                                                                                                                                                                                                                                                                                                                                                                                                                                                                                                                                                                                                                                                                                                                                                                                                                                                                                                                                                                                                                                                                                                                                                                                                                                                                                                                                                                                                                                                                                                                                                                                                                                                                                                                                                                                                                                                                                                                                                                                                                                                                                | C10 H8 O4  | + 8.26   | 5.14E+06          | 193.0495       | 193.0486  |
| 24      | 2684               | 24       | phenylpropanoic acid, Isoeugenol                                                                                                                                                                                                                                                                                                                                                                                                                                                                                                                                                                                                                                                                                                                                                                                                                                                                                                                                                                                                                                                                                                                                                                                                                                                                                                                                                                                                                                                                                                                                                                                                                                                                                                                                                                                                                                                                                                                                                                                                                                                                                                                                                                                                                                                                                                                                                                                                                                                                                                                                                                                                                                                                                                                                                                                                                                                                                                                                                                                                                                                                                                                                                                                                                                                                                                                                                                                                                                                                                                                                                                                                                                                                                                                                                                                                                                                                                                                                                                                                                                                                                                                                                                                                                                                                                                                                                                                                                                                                                                                                                                                                                                                                                                                                                                                                                                                                                                                                                                                                                                                                                                                                                                                                                                                                                                                                                                                                                                                                                                                                                                                                                                                                                                                                                                                                                                                                                                                                                                                                                                                                                                                                                                                                                                                                                                                                                                                                                                                                                                                                                                                                                                                                                                                                                                                                                                                                                                                                                                                                                                                                                                                                                                                                                                                                                                                                                                                                                                                                                                                                | C10 H12 O2 | + 7.00   | 1.32E+07          | 165.0910       | 165.0902  |
| 25      | 2744               | 25       | phenylpropanoic acid, Begenin                                                                                                                                                                                                                                                                                                                                                                                                                                                                                                                                                                                                                                                                                                                                                                                                                                                                                                                                                                                                                                                                                                                                                                                                                                                                                                                                                                                                                                                                                                                                                                                                                                                                                                                                                                                                                                                                                                                                                                                                                                                                                                                                                                                                                                                                                                                                                                                                                                                                                                                                                                                                                                                                                                                                                                                                                                                                                                                                                                                                                                                                                                                                                                                                                                                                                                                                                                                                                                                                                                                                                                                                                                                                                                                                                                                                                                                                                                                                                                                                                                                                                                                                                                                                                                                                                                                                                                                                                                                                                                                                                                                                                                                                                                                                                                                                                                                                                                                                                                                                                                                                                                                                                                                                                                                                                                                                                                                                                                                                                                                                                                                                                                                                                                                                                                                                                                                                                                                                                                                                                                                                                                                                                                                                                                                                                                                                                                                                                                                                                                                                                                                                                                                                                                                                                                                                                                                                                                                                                                                                                                                                                                                                                                                                                                                                                                                                                                                                                                                                                                                                   | C14 H16 O5 | + 10.45  | 2.47E+06          | 227.0728       | 227.0718  |
| 26      | 2120               | 26       | phenylpropanoic acid, CHEMBRDG-86.6484841                                                                                                                                                                                                                                                                                                                                                                                                                                                                                                                                                                                                                                                                                                                                                                                                                                                                                                                                                                                                                                                                                                                                                                                                                                                                                                                                                                                                                                                                                                                                                                                                                                                                                                                                                                                                                                                                                                                                                                                                                                                                                                                                                                                                                                                                                                                                                                                                                                                                                                                                                                                                                                                                                                                                                                                                                                                                                                                                                                                                                                                                                                                                                                                                                                                                                                                                                                                                                                                                                                                                                                                                                                                                                                                                                                                                                                                                                                                                                                                                                                                                                                                                                                                                                                                                                                                                                                                                                                                                                                                                                                                                                                                                                                                                                                                                                                                                                                                                                                                                                                                                                                                                                                                                                                                                                                                                                                                                                                                                                                                                                                                                                                                                                                                                                                                                                                                                                                                                                                                                                                                                                                                                                                                                                                                                                                                                                                                                                                                                                                                                                                                                                                                                                                                                                                                                                                                                                                                                                                                                                                                                                                                                                                                                                                                                                                                                                                                                                                                                                                                       | C13 H14 O2 | + 8.78   | 7.52E+06          | 203.1067       | 203.1059  |
| 27      | 2330               | 27       | phenylpropanoic acid, (5,7-Dihydroxy-4-methyl-2-oxo-2H-chromen-3-yl)acetic acid                                                                                                                                                                                                                                                                                                                                                                                                                                                                                                                                                                                                                                                                                                                                                                                                                                                                                                                                                                                                                                                                                                                                                                                                                                                                                                                                                                                                                                                                                                                                                                                                                                                                                                                                                                                                                                                                                                                                                                                                                                                                                                                                                                                                                                                                                                                                                                                                                                                                                                                                                                                                                                                                                                                                                                                                                                                                                                                                                                                                                                                                                                                                                                                                                                                                                                                                                                                                                                                                                                                                                                                                                                                                                                                                                                                                                                                                                                                                                                                                                                                                                                                                                                                                                                                                                                                                                                                                                                                                                                                                                                                                                                                                                                                                                                                                                                                                                                                                                                                                                                                                                                                                                                                                                                                                                                                                                                                                                                                                                                                                                                                                                                                                                                                                                                                                                                                                                                                                                                                                                                                                                                                                                                                                                                                                                                                                                                                                                                                                                                                                                                                                                                                                                                                                                                                                                                                                                                                                                                                                                                                                                                                                                                                                                                                                                                                                                                                                                                                                                 | C13 H10 O6 | + 4.59   | 1.53E+08          | 251.0550       | 251.0539  |
| 28      | 2342               | 28       | phenylpropanoic acid, 5-Methoxy-4-oxo-4H-chromene-2-carboxylic acid                                                                                                                                                                                                                                                                                                                                                                                                                                                                                                                                                                                                                                                                                                                                                                                                                                                                                                                                                                                                                                                                                                                                                                                                                                                                                                                                                                                                                                                                                                                                                                                                                                                                                                                                                                                                                                                                                                                                                                                                                                                                                                                                                                                                                                                                                                                                                                                                                                                                                                                                                                                                                                                                                                                                                                                                                                                                                                                                                                                                                                                                                                                                                                                                                                                                                                                                                                                                                                                                                                                                                                                                                                                                                                                                                                                                                                                                                                                                                                                                                                                                                                                                                                                                                                                                                                                                                                                                                                                                                                                                                                                                                                                                                                                                                                                                                                                                                                                                                                                                                                                                                                                                                                                                                                                                                                                                                                                                                                                                                                                                                                                                                                                                                                                                                                                                                                                                                                                                                                                                                                                                                                                                                                                                                                                                                                                                                                                                                                                                                                                                                                                                                                                                                                                                                                                                                                                                                                                                                                                                                                                                                                                                                                                                                                                                                                                                                                                                                                                                                             | C13 H8 O5  | + 4.34   | 1.32E+07          | 221.0444       | 221.0436  |
| 29      | 2488               | 29       | phenylpropanoic acid, 4,5-Di-O-methyl-8-methylene-4-methoxyphenyl-5-methyl-2H-pyran-3-ol                                                                                                                                                                                                                                                                                                                                                                                                                                                                                                                                                                                                                                                                                                                                                                                                                                                                                                                                                                                                                                                                                                                                                                                                                                                                                                                                                                                                                                                                                                                                                                                                                                                                                                                                                                                                                                                                                                                                                                                                                                                                                                                                                                                                                                                                                                                                                                                                                                                                                                                                                                                                                                                                                                                                                                                                                                                                                                                                                                                                                                                                                                                                                                                                                                                                                                                                                                                                                                                                                                                                                                                                                                                                                                                                                                                                                                                                                                                                                                                                                                                                                                                                                                                                                                                                                                                                                                                                                                                                                                                                                                                                                                                                                                                                                                                                                                                                                                                                                                                                                                                                                                                                                                                                                                                                                                                                                                                                                                                                                                                                                                                                                                                                                                                                                                                                                                                                                                                                                                                                                                                                                                                                                                                                                                                                                                                                                                                                                                                                                                                                                                                                                                                                                                                                                                                                                                                                                                                                                                                                                                                                                                                                                                                                                                                                                                                                                                                                                                                                        | C13 H16 O5 | + 23.79  | 3.18E+07          | 231.1380       | 231.1371  |
| 30      | 843                | 30       | phenylpropanoic acid, Ethyl-3-(7-12-(alkoxy)-2-oxoethoxy)-4,8-dimethyl-2H-pyran-3-ol                                                                                                                                                                                                                                                                                                                                                                                                                                                                                                                                                                                                                                                                                                                                                                                                                                                                                                                                                                                                                                                                                                                                                                                                                                                                                                                                                                                                                                                                                                                                                                                                                                                                                                                                                                                                                                                                                                                                                                                                                                                                                                                                                                                                                                                                                                                                                                                                                                                                                                                                                                                                                                                                                                                                                                                                                                                                                                                                                                                                                                                                                                                                                                                                                                                                                                                                                                                                                                                                                                                                                                                                                                                                                                                                                                                                                                                                                                                                                                                                                                                                                                                                                                                                                                                                                                                                                                                                                                                                                                                                                                                                                                                                                                                                                                                                                                                                                                                                                                                                                                                                                                                                                                                                                                                                                                                                                                                                                                                                                                                                                                                                                                                                                                                                                                                                                                                                                                                                                                                                                                                                                                                                                                                                                                                                                                                                                                                                                                                                                                                                                                                                                                                                                                                                                                                                                                                                                                                                                                                                                                                                                                                                                                                                                                                                                                                                                                                                                                                                            | C21 H24 O7 | + 7.41   | 1.88E+07          | 389.1595       | 389.1578  |
| 31      | 844                | 31       | phenylpropanoic acid, (3R,4R)-4-[(3,4-dimethoxyphenyl)methyl]-3,4-dihydro-2H-pyran-3-ol                                                                                                                                                                                                                                                                                                                                                                                                                                                                                                                                                                                                                                                                                                                                                                                                                                                                                                                                                                                                                                                                                                                                                                                                                                                                                                                                                                                                                                                                                                                                                                                                                                                                                                                                                                                                                                                                                                                                                                                                                                                                                                                                                                                                                                                                                                                                                                                                                                                                                                                                                                                                                                                                                                                                                                                                                                                                                                                                                                                                                                                                                                                                                                                                                                                                                                                                                                                                                                                                                                                                                                                                                                                                                                                                                                                                                                                                                                                                                                                                                                                                                                                                                                                                                                                                                                                                                                                                                                                                                                                                                                                                                                                                                                                                                                                                                                                                                                                                                                                                                                                                                                                                                                                                                                                                                                                                                                                                                                                                                                                                                                                                                                                                                                                                                                                                                                                                                                                                                                                                                                                                                                                                                                                                                                                                                                                                                                                                                                                                                                                                                                                                                                                                                                                                                                                                                                                                                                                                                                                                                                                                                                                                                                                                                                                                                                                                                                                                                                                                         | C21 H24 O6 | + 9.20   | 3.90E+07          | 373.1646       | 373.1578  |
| 32      | 1053               | 32       | phenylpropanoic acid, Mataresinol                                                                                                                                                                                                                                                                                                                                                                                                                                                                                                                                                                                                                                                                                                                                                                                                                                                                                                                                                                                                                                                                                                                                                                                                                                                                                                                                                                                                                                                                                                                                                                                                                                                                                                                                                                                                                                                                                                                                                                                                                                                                                                                                                                                                                                                                                                                                                                                                                                                                                                                                                                                                                                                                                                                                                                                                                                                                                                                                                                                                                                                                                                                                                                                                                                                                                                                                                                                                                                                                                                                                                                                                                                                                                                                                                                                                                                                                                                                                                                                                                                                                                                                                                                                                                                                                                                                                                                                                                                                                                                                                                                                                                                                                                                                                                                                                                                                                                                                                                                                                                                                                                                                                                                                                                                                                                                                                                                                                                                                                                                                                                                                                                                                                                                                                                                                                                                                                                                                                                                                                                                                                                                                                                                                                                                                                                                                                                                                                                                                                                                                                                                                                                                                                                                                                                                                                                                                                                                                                                                                                                                                                                                                                                                                                                                                                                                                                                                                                                                                                                                                               | C20 H22 O6 | + 8.56   | 5.80E+06          | 359.1489       | 359.1474  |
| 33      | 1797               | 33       | phenylpropanoic acid, Luwangtin                                                                                                                                                                                                                                                                                                                                                                                                                                                                                                                                                                                                                                                                                                                                                                                                                                                                                                                                                                                                                                                                                                                                                                                                                                                                                                                                                                                                                                                                                                                                                                                                                                                                                                                                                                                                                                                                                                                                                                                                                                                                                                                                                                                                                                                                                                                                                                                                                                                                                                                                                                                                                                                                                                                                                                                                                                                                                                                                                                                                                                                                                                                                                                                                                                                                                                                                                                                                                                                                                                                                                                                                                                                                                                                                                                                                                                                                                                                                                                                                                                                                                                                                                                                                                                                                                                                                                                                                                                                                                                                                                                                                                                                                                                                                                                                                                                                                                                                                                                                                                                                                                                                                                                                                                                                                                                                                                                                                                                                                                                                                                                                                                                                                                                                                                                                                                                                                                                                                                                                                                                                                                                                                                                                                                                                                                                                                                                                                                                                                                                                                                                                                                                                                                                                                                                                                                                                                                                                                                                                                                                                                                                                                                                                                                                                                                                                                                                                                                                                                                                                                 | C15 H14 O4 | + 11.31  | 2.22E+08          | 259.0965       | 259.0954  |
| 34      | 1897               | 34       | phenylpropanoic acid, 3-allyl-4-methoxyphenyl-5-methyl-2H-pyran-3-ol                                                                                                                                                                                                                                                                                                                                                                                                                                                                                                                                                                                                                                                                                                                                                                                                                                                                                                                                                                                                                                                                                                                                                                                                                                                                                                                                                                                                                                                                                                                                                                                                                                                                                                                                                                                                                                                                                                                                                                                                                                                                                                                                                                                                                                                                                                                                                                                                                                                                                                                                                                                                                                                                                                                                                                                                                                                                                                                                                                                                                                                                                                                                                                                                                                                                                                                                                                                                                                                                                                                                                                                                                                                                                                                                                                                                                                                                                                                                                                                                                                                                                                                                                                                                                                                                                                                                                                                                                                                                                                                                                                                                                                                                                                                                                                                                                                                                                                                                                                                                                                                                                                                                                                                                                                                                                                                                                                                                                                                                                                                                                                                                                                                                                                                                                                                                                                                                                                                                                                                                                                                                                                                                                                                                                                                                                                                                                                                                                                                                                                                                                                                                                                                                                                                                                                                                                                                                                                                                                                                                                                                                                                                                                                                                                                                                                                                                                                                                                                                                                            | C14 H20 O3 | + 8.85   | 2.46E+06          | 265.1597       | 265.1579  |
| 35      | 1904               | 35       | phenylpropanoic acid, Trolox                                                                                                                                                                                                                                                                                                                                                                                                                                                                                                                                                                                                                                                                                                                                                                                                                                                                                                                                                                                                                                                                                                                                                                                                                                                                                                                                                                                                                                                                                                                                                                                                                                                                                                                                                                                                                                                                                                                                                                                                                                                                                                                                                                                                                                                                                                                                                                                                                                                                                                                                                                                                                                                                                                                                                                                                                                                                                                                                                                                                                                                                                                                                                                                                                                                                                                                                                                                                                                                                                                                                                                                                                                                                                                                                                                                                                                                                                                                                                                                                                                                                                                                                                                                                                                                                                                                                                                                                                                                                                                                                                                                                                                                                                                                                                                                                                                                                                                                                                                                                                                                                                                                                                                                                                                                                                                                                                                                                                                                                                                                                                                                                                                                                                                                                                                                                                                                                                                                                                                                                                                                                                                                                                                                                                                                                                                                                                                                                                                                                                                                                                                                                                                                                                                                                                                                                                                                                                                                                                                                                                                                                                                                                                                                                                                                                                                                                                                                                                                                                                                                                    | C14 H18 O4 | + 8.63   | 1.75E+06          | 251.1278       | 251.1200  |
| 36      | 2401               | 36       | phenylpropanoic acid, threo-Syringylglycerol                                                                                                                                                                                                                                                                                                                                                                                                                                                                                                                                                                                                                                                                                                                                                                                                                                                                                                                                                                                                                                                                                                                                                                                                                                                                                                                                                                                                                                                                                                                                                                                                                                                                                                                                                                                                                                                                                                                                                                                                                                                                                                                                                                                                                                                                                                                                                                                                                                                                                                                                                                                                                                                                                                                                                                                                                                                                                                                                                                                                                                                                                                                                                                                                                                                                                                                                                                                                                                                                                                                                                                                                                                                                                                                                                                                                                                                                                                                                                                                                                                                                                                                                                                                                                                                                                                                                                                                                                                                                                                                                                                                                                                                                                                                                                                                                                                                                                                                                                                                                                                                                                                                                                                                                                                                                                                                                                                                                                                                                                                                                                                                                                                                                                                                                                                                                                                                                                                                                                                                                                                                                                                                                                                                                                                                                                                                                                                                                                                                                                                                                                                                                                                                                                                                                                                                                                                                                                                                                                                                                                                                                                                                                                                                                                                                                                                                                                                                                                                                                                                                    | C11 H16 O6 | + 4.51   | 1.45E+07          | 245.1020       | 245.1012  |
| 37      | 2623               | 37       | phenylpropanoic acid, Hydrocinnamyl Alcohol                                                                                                                                                                                                                                                                                                                                                                                                                                                                                                                                                                                                                                                                                                                                                                                                                                                                                                                                                                                                                                                                                                                                                                                                                                                                                                                                                                                                                                                                                                                                                                                                                                                                                                                                                                                                                                                                                                                                                                                                                                                                                                                                                                                                                                                                                                                                                                                                                                                                                                                                                                                                                                                                                                                                                                                                                                                                                                                                                                                                                                                                                                                                                                                                                                                                                                                                                                                                                                                                                                                                                                                                                                                                                                                                                                                                                                                                                                                                                                                                                                                                                                                                                                                                                                                                                                                                                                                                                                                                                                                                                                                                                                                                                                                                                                                                                                                                                                                                                                                                                                                                                                                                                                                                                                                                                                                                                                                                                                                                                                                                                                                                                                                                                                                                                                                                                                                                                                                                                                                                                                                                                                                                                                                                                                                                                                                                                                                                                                                                                                                                                                                                                                                                                                                                                                                                                                                                                                                                                                                                                                                                                                                                                                                                                                                                                                                                                                                                                                                                                                                     | C10 H14 O3 | + 7.04   | 1.17E+07          | 183.1018       | 183.1008  |
| 38      | 2638               | 38       | phenylpropanoic acid, 4-Methoxybenzylidenehydrate                                                                                                                                                                                                                                                                                                                                                                                                                                                                                                                                                                                                                                                                                                                                                                                                                                                                                                                                                                                                                                                                                                                                                                                                                                                                                                                                                                                                                                                                                                                                                                                                                                                                                                                                                                                                                                                                                                                                                                                                                                                                                                                                                                                                                                                                                                                                                                                                                                                                                                                                                                                                                                                                                                                                                                                                                                                                                                                                                                                                                                                                                                                                                                                                                                                                                                                                                                                                                                                                                                                                                                                                                                                                                                                                                                                                                                                                                                                                                                                                                                                                                                                                                                                                                                                                                                                                                                                                                                                                                                                                                                                                                                                                                                                                                                                                                                                                                                                                                                                                                                                                                                                                                                                                                                                                                                                                                                                                                                                                                                                                                                                                                                                                                                                                                                                                                                                                                                                                                                                                                                                                                                                                                                                                                                                                                                                                                                                                                                                                                                                                                                                                                                                                                                                                                                                                                                                                                                                                                                                                                                                                                                                                                                                                                                                                                                                                                                                                                                                                                                               | C10 H8 O3  | + 6.35   | 8.98E+06          | 159.0431       | 159.0423  |
| 39      | 2679               | 39       | phenylpropanoic acid, 4-Methoxyhydrocinnamic acid                                                                                                                                                                                                                                                                                                                                                                                                                                                                                                                                                                                                                                                                                                                                                                                                                                                                                                                                                                                                                                                                                                                                                                                                                                                                                                                                                                                                                                                                                                                                                                                                                                                                                                                                                                                                                                                                                                                                                                                                                                                                                                                                                                                                                                                                                                                                                                                                                                                                                                                                                                                                                                                                                                                                                                                                                                                                                                                                                                                                                                                                                                                                                                                                                                                                                                                                                                                                                                                                                                                                                                                                                                                                                                                                                                                                                                                                                                                                                                                                                                                                                                                                                                                                                                                                                                                                                                                                                                                                                                                                                                                                                                                                                                                                                                                                                                                                                                                                                                                                                                                                                                                                                                                                                                                                                                                                                                                                                                                                                                                                                                                                                                                                                                                                                                                                                                                                                                                                                                                                                                                                                                                                                                                                                                                                                                                                                                                                                                                                                                                                                                                                                                                                                                                                                                                                                                                                                                                                                                                                                                                                                                                                                                                                                                                                                                                                                                                                                                                                                                               | C10 H12 O3 | + 4.53   | 8.63E+06          | 181.0859       | 181.0850  |
| 40      | 5                  | 40       | phenylpropanoic acid, NP-021030                                                                                                                                                                                                                                                                                                                                                                                                                                                                                                                                                                                                                                                                                                                                                                                                                                                                                                                                                                                                                                                                                                                                                                                                                                                                                                                                                                                                                                                                                                                                                                                                                                                                                                                                                                                                                                                                                                                                                                                                                                                                                                                                                                                                                                                                                                                                                                                                                                                                                                                                                                                                                                                                                                                                                                                                                                                                                                                                                                                                                                                                                                                                                                                                                                                                                                                                                                                                                                                                                                                                                                                                                                                                                                                                                                                                                                                                                                                                                                                                                                                                                                                                                                                                                                                                                                                                                                                                                                                                                                                                                                                                                                                                                                                                                                                                                                                                                                                                                                                                                                                                                                                                                                                                                                                                                                                                                                                                                                                                                                                                                                                                                                                                                                                                                                                                                                                                                                                                                                                                                                                                                                                                                                                                                                                                                                                                                                                                                                                                                                                                                                                                                                                                                                                                                                                                                                                                                                                                                                                                                                                                                                                                                                                                                                                                                                                                                                                                                                                                                                                                 | C9 H8 O4   | + 5.69   | 5.57E+06          | 181.0495       | 181.0486  |
| 41      | 429                | 1        | terpene, Lup-20(29)-ene-3,28-diyol (2E,2'Ebis(3-phenylallyl)-3,28-dihydro-1,2,3,4-tetrahydronaphthalene-12-ene)                                                                                                                                                                                                                                                                                                                                                                                                                                                                                                                                                                                                                                                                                                                                                                                                                                                                                                                                                                                                                                                                                                                                                                                                                                                                                                                                                                                                                                                                                                                                                                                                                                                                                                                                                                                                                                                                                                                                                                                                                                                                                                                                                                                                                                                                                                                                                                                                                                                                                                                                                                                                                                                                                                                                                                                                                                                                                                                                                                                                                                                                                                                                                                                                                                                                                                                                                                                                                                                                                                                                                                                                                                                                                                                                                                                                                                                                                                                                                                                                                                                                                                                                                                                                                                                                                                                                                                                                                                                                                                                                                                                                                                                                                                                                                                                                                                                                                                                                                                                                                                                                                                                                                                                                                                                                                                                                                                                                                                                                                                                                                                                                                                                                                                                                                                                                                                                                                                                                                                                                                                                                                                                                                                                                                                                                                                                                                                                                                                                                                                                                                                                                                                                                                                                                                                                                                                                                                                                                                                                                                                                                                                                                                                                                                                                                                                                                                                                                                                                 | C48 H62 O4 | + 18.84  | 3.76E+07          | 703.4721       | 703.4720  |
| 42      | 451                | 2        | terpene, Cheta-3, beta-D-Xylopranosylxylan-12-ene                                                                                                                                                                                                                                                                                                                                                                                                                                                                                                                                                                                                                                                                                                                                                                                                                                                                                                                                                                                                                                                                                                                                                                                                                                                                                                                                                                                                                                                                                                                                                                                                                                                                                                                                                                                                                                                                                                                                                                                                                                                                                                                                                                                                                                                                                                                                                                                                                                                                                                                                                                                                                                                                                                                                                                                                                                                                                                                                                                                                                                                                                                                                                                                                                                                                                                                                                                                                                                                                                                                                                                                                                                                                                                                                                                                                                                                                                                                                                                                                                                                                                                                                                                                                                                                                                                                                                                                                                                                                                                                                                                                                                                                                                                                                                                                                                                                                                                                                                                                                                                                                                                                                                                                                                                                                                                                                                                                                                                                                                                                                                                                                                                                                                                                                                                                                                                                                                                                                                                                                                                                                                                                                                                                                                                                                                                                                                                                                                                                                                                                                                                                                                                                                                                                                                                                                                                                                                                                                                                                                                                                                                                                                                                                                                                                                                                                                                                                                                                                                                                               | C48 H58 O7 | + 18.90  | 6.35E+07          | 705.4003       | 705.4002  |
| 43      | 500                | 3        | terpene, Triolollic acid                                                                                                                                                                                                                                                                                                                                                                                                                                                                                                                                                                                                                                                                                                                                                                                                                                                                                                                                                                                                                                                                                                                                                                                                                                                                                                                                                                                                                                                                                                                                                                                                                                                                                                                                                                                                                                                                                                                                                                                                                                                                                                                                                                                                                                                                                                                                                                                                                                                                                                                                                                                                                                                                                                                                                                                                                                                                                                                                                                                                                                                                                                                                                                                                                                                                                                                                                                                                                                                                                                                                                                                                                                                                                                                                                                                                                                                                                                                                                                                                                                                                                                                                                                                                                                                                                                                                                                                                                                                                                                                                                                                                                                                                                                                                                                                                                                                                                                                                                                                                                                                                                                                                                                                                                                                                                                                                                                                                                                                                                                                                                                                                                                                                                                                                                                                                                                                                                                                                                                                                                                                                                                                                                                                                                                                                                                                                                                                                                                                                                                                                                                                                                                                                                                                                                                                                                                                                                                                                                                                                                                                                                                                                                                                                                                                                                                                                                                                                                                                                                                                                        | C40 H48 O3 | + 21.34  | 3.68E+06          | 457.36702      | 457.36504 |
| 44      | 513                | 4        | terpene, NP-022711                                                                                                                                                                                                                                                                                                                                                                                                                                                                                                                                                                                                                                                                                                                                                                                                                                                                                                                                                                                                                                                                                                                                                                                                                                                                                                                                                                                                                                                                                                                                                                                                                                                                                                                                                                                                                                                                                                                                                                                                                                                                                                                                                                                                                                                                                                                                                                                                                                                                                                                                                                                                                                                                                                                                                                                                                                                                                                                                                                                                                                                                                                                                                                                                                                                                                                                                                                                                                                                                                                                                                                                                                                                                                                                                                                                                                                                                                                                                                                                                                                                                                                                                                                                                                                                                                                                                                                                                                                                                                                                                                                                                                                                                                                                                                                                                                                                                                                                                                                                                                                                                                                                                                                                                                                                                                                                                                                                                                                                                                                                                                                                                                                                                                                                                                                                                                                                                                                                                                                                                                                                                                                                                                                                                                                                                                                                                                                                                                                                                                                                                                                                                                                                                                                                                                                                                                                                                                                                                                                                                                                                                                                                                                                                                                                                                                                                                                                                                                                                                                                                                              | C30 H48 O2 | + 22.98  | 1.03E+07          | 441.3708       | 441.3708  |
| 45      | 516                | 5        | terpene, (1R,2S,5S,8R,10R,14R)-20-hydroxy-1,2,14,18-pentacyclic-1,2,3,4,5,6,7,8,9,10,11,12,13,14,15,16,17,18,19,20,21,22,23,24,25,26,27,28,29,30,31,32,33,34,35,36,37,38,39,40,41,42,43,44,45,46,47,48,49,50,51,52,53,54,55,56,57,58,59,60,61,62,63,64,65,66,67,68,69,70,71,72,73,74,75,76,77,78,79,80,81,82,83,84,85,86,87,88,89,90,91,92,93,94,95,96,97,98,99,100,101,102,103,104,105,106,107,108,109,110,111,112,113,114,115,116,117,118,119,120,121,122,123,124,125,126,127,128,129,130,131,132,133,134,135,136,137,138,139,140,141,142,143,144,145,146,147,148,149,150,151,152,153,154,155,156,157,158,159,160,161,162,163,164,165,166,167,168,169,170,171,172,173,174,175,176,177,178,179,180,181,182,183,184,185,186,187,188,189,190,191,192,193,194,195,196,197,198,199,200,201,202,203,204,205,206,207,208,209,210,211,212,213,214,215,216,217,218,219,220,221,222,223,224,225,226,227,228,229,230,231,232,233,234,235,236,237,238,239,240,241,242,243,244,245,246,247,248,249,250,251,252,253,254,255,256,257,258,259,260,261,262,263,264,265,266,267,268,269,270,271,272,273,274,275,276,277,278,279,280,281,282,283,284,285,286,287,288,289,290,291,292,293,294,295,296,297,298,299,300,301,302,303,304,305,306,307,308,309,310,311,312,313,314,315,316,317,318,319,320,321,322,323,324,325,326,327,328,329,330,331,332,333,334,335,336,337,338,339,340,341,342,343,344,345,346,347,348,349,350,351,352,353,354,355,356,357,358,359,360,361,362,363,364,365,366,367,368,369,370,371,372,373,374,375,376,377,378,379,380,381,382,383,384,385,386,387,388,389,390,391,392,393,394,395,396,397,398,399,400,401,402,403,404,405,406,407,408,409,410,411,412,413,414,415,416,417,418,419,420,421,422,423,424,425,426,427,428,429,430,431,432,433,434,435,436,437,438,439,440,441,442,443,444,445,446,447,448,449,450,451,452,453,454,455,456,457,458,459,460,461,462,463,464,465,466,467,468,469,470,471,472,473,474,475,476,477,478,479,480,481,482,483,484,485,486,487,488,489,490,491,492,493,494,495,496,497,498,499,500,501,502,503,504,505,506,507,508,509,510,511,512,513,514,515,516,517,518,519,520,521,522,523,524,525,526,527,528,529,530,531,532,533,534,535,536,537,538,539,540,541,542,543,544,545,546,547,548,549,550,551,552,553,554,555,556,557,558,559,560,561,562,563,564,565,566,567,568,569,570,571,572,573,574,575,576,577,578,579,580,581,582,583,584,585,586,587,588,589,590,591,592,593,594,595,596,597,598,599,600,601,602,603,604,605,606,607,608,609,610,611,612,613,614,615,616,617,618,619,620,621,622,623,624,625,626,627,628,629,630,631,632,633,634,635,636,637,638,639,640,641,642,643,644,645,646,647,648,649,650,651,652,653,654,655,656,657,658,659,660,661,662,663,664,665,666,667,668,669,670,671,672,673,674,675,676,677,678,679,680,681,682,683,684,685,686,687,688,689,690,691,692,693,694,695,696,697,698,699,700,701,702,703,704,705,706,707,708,709,710,711,712,713,714,715,716,717,718,719,720,721,722,723,724,725,726,727,728,729,730,731,732,733,734,735,736,737,738,739,740,741,742,743,744,745,746,747,748,749,750,751,752,753,754,755,756,757,758,759,760,761,762,763,764,765,766,767,768,769,770,771,772,773,774,775,776,777,778,779,780,781,782,783,784,785,786,787,788,789,790,791,792,793,794,795,796,797,798,799,800,801,802,803,804,805,806,807,808,809,810,811,812,813,814,815,816,817,818,819,820,821,822,823,824,825,826,827,828,829,830,831,832,833,834,835,836,837,838,839,840,841,842,843,844,845,846,847,848,849,850,851,852,853,854,855,856,857,858,859,860,861,862,863,864,865,866,867,868,869,870,871,872,873,874,875,876,877,878,879,880,881,882,883,884,885,886,887,888,889,890,891,892,893,894,895,896,897,898,899,900,901,902,903,904,905,906,907,908,909,910,911,912,913,914,915,916,917,918,919,920,921,922,923,924,925,926,927,928,929,930,931,932,933,934,935,936,937,938,939,940,941,942,943,944,945,946,947,948,949,950,951,952,953,954,955,956,957,958,959,960,961,962,963,964,965,966,967,968,969,970,971,972,973,974,975,976,977,978,979,980,981,982,983,984,985,986,987,988,989,990,991,992,993,994,995,996,997,998,999,1000,1001,1002,1003,1004,1005,1006,1007,1008,1009,1010,1011,1012,1013,1014,1015,1016,1017,1018,1019,1020,1021,1022,1023,1024,1025,1026,1027,1028,1029,1030,1031,1032,1033,1034,1035,1036,1037,1038,1039,1040,1041,1042,1043,1044,1045,1046,1047,1048,1049,1050,1051,1052,1053,1054,1055,1056,1057,1058,1059,1060,1061,1062,1063,1064,1065,1066,1067,1068,1069,1070,1071,1072,1073,1074,1075,1076,1077,1078,1079,1080,1081,1082,1083,1084,1085,1086,1087,1088,1089,1090,1091,1092,1093,1094,1095,1096,1097,1098,1099,1100,1101,1102,1103,1104,1105,1106,1107,1108,1109,1110,1111,1112,1113,1114,1115,1116,1117,1118,1119,1120,1121,1122,1123,1124,1125,1126,1127,1128,1129,1130,1131,1132,1133,1134,1135,1136,1137,1138,1139,1140,1141,1142,1143,1144,1145,1146,1147,1148,1149,1150,1151,1152,1153,1154,1155,1156,1157,1158,1159,1160,1161,1162,1163,1164,1165,1166,1167,1168,1169,1170,1171,1172,1173,1174,1175,1176,1177,1178,1179,1180,1181,1182,1183,1184,1185,1186,1187,1188,1189,1190,1191,1192,1193,1194,1195,1196,1197,1198,1199,1200,1201,1202,1203,1204,1205,1206,1207,1208,1209,1210,1211,1212,1213,1214,1215,1216,1217,1218,1219,1220,1221,1222,1223,1224,1225,1226,1227,1228,1229,1230,1231,1232,1233,1234,1235,1236,1237,1238,1239,1240,1241,1242,1243,1244,1245,1246,1247,1248,1249,1250,1251,1252,1253,1254,1255,1256,1257,1258,1259,1260,1261,1262,1263,1264,1265,1266,1267,1268,1269,1270,1271,1272,1273,1274,1275,1276,1277,1278,1279,1280,1281,1282,1283,1284,1285,1286,1287,1288,1289,1290,1291,1292,1293,1294,1295,1296,1297,1298,1299,1300,1301,1302,1303,1304,1305,1306,1307,1308,1309,1310,1311,1312,1313,1314,1315,1316,1317,1318,1319,1320,1321,1322,1323,1324,1325,1326,1327,1328,1329,1330,1331,1332,1333,1334,1335,1336,1337,1338,1339,1340,1341,1342,1343,1344,1345,1346,1347,1348,1349,1350,1351,1352,1353,1354,1355,1356,1357,1358,1359,1360,1361,1362,1363,1364,1365,1366,1367,1368,1369,1370,1371,1372,1373,1374,1375,1376,1377,1378,1379,1380,1381,1382,1383,1384,1385,1386,1387,1388,1389,1390,1391,1392,1393,1394,1395,1396,1397,1398,1399,1400,1401,1402,1403,1404,1405,1406,1407,1408,1409,1410,1411,1412,1413,1414,1415,1416,1417,1418,1419,1420,1421,1422,1423,1424,1425,1426,1427,1428,1429,1430,1431,1432,1433,1434,1435,1436,1437,1438,1439,1440,1441,1442,1443,1444,1445,1446,1447,1448,1449,1450,1451,1452,1453,1454,1455,1456,1457,1458,1459,1460,1461,1462,1463,1464,1465,1466,1467,1468,1469,1470,1471,1472,1473,1474,1475,1476,1477,1478,1479,1480,1481,1482,1483,1484,1485,1486,1487,1488,1489,1490,1491,1492,1493,1494,1495,1496,1497,1498,1499,1500,1501,1502,1503,1504,1505,1506,1507,1508,1509,1510,1511,1512,1513,1514,1515,1516,1517,1518,1519,1520,1521,1522,1523,1524,1525,1526,1527,1528,1529,1530,1531,1532,1533,1534,1535,1536,1537,1538,1539,1540,1541,1542,1543,1544,1545,1546,1547,1548,1549,1550,1551,1552,1553,1554,1555,1556,1557,1558,1559,1560,1561,1562,1563,1564,1565,1566,1567,1568,1569,1570,1571,1572,1573,1574,1575,1576,1577,1578,1579,1580,1581,1582,1583,1584,1585,1586,1587,1588,1589,1590,1591,1592,1593,1594,1595,1596,1597,1598,1599,1600,1601,1602,1603,1604,1605,1606,1607,1608,1609,1610,1611,1612,1613,1614,1615,1616,1617,1618,1619,1620,1621,1622,1623,1624,1625,1626,1627,1628,1629,1630,1631,1632,1633,1634,1635,1636,1637,1638,1639,1640,1641,1642,1643,1644,1645,1646,1647,1648,1649,1650,1651,1652,1653,1654,1655,1656,1657,1658,1659,1660,1661,1 |            |          |                   |                |           |



|     |           |                                                                   |            |         |          |           |           |                                                                              |
|-----|-----------|-------------------------------------------------------------------|------------|---------|----------|-----------|-----------|------------------------------------------------------------------------------|
| 160 | 310 C36   | phenolic acids, Benzoic acid                                      | C7 H6 O2   | + 6.23  | 8.00E+06 | 123.0441  | 123.0434  | 95.0487,79.0538,77.0382,65.0383,51.0227                                      |
| 161 | 313 C37   | phenolic acids, 5,6-Dioxo-1,3-cyclohexadiene-1-carboxylic acid    | C7 H4 O4   | + 7.57  | 1.38E+07 | 153.0182  | 153.0175  | 125.027,97.0279,83.0123                                                      |
| 162 | 315 C38   | phenolic acids, 5-Hydroxy-1,3-benzodioxol-2-one                   | C7 H4 O6   | + 6.34  | 8.75E+06 | 153.0177  | 153.0177  | 92.0254,81.0332,1.0277                                                       |
| 163 | 320 C39   | phenolic acids, D-pinol                                           | C7 H14 O6  | + 1.14  | 4.35E+06 | 159.0683  | 159.0685  | 159.0645,148.051,120.0802,69.0332                                            |
| 164 | 326 C40   | phenolic acids, butyl acrylate                                    | C7 H12 O2  | + 6.05  | 9.22E+05 | 129.0910  | 129.0541  | 111.0435,73.0281,69.0696                                                     |
| 165 | 330 C41   | phenolic acids, Succinylacetone                                   | C7 H10 O4  | + 4.00  | 4.96E+06 | 159.0652  | 159.0645  | 141.0540,132.1337,113.0592,85.0281,57.0332                                   |
| 166 | 331 C42   | phenolic acids, dimethyl itaconate                                | C7 H10 O4  | + 21.29 | 4.27E+06 | 159.0652  | 159.0644  | 119.0849,115.0536,99.0436,71.0488,55.0540                                    |
| 167 | 341 C43   | phenolic acids, 3,6-Dimethyl-2-methylene-5-butyrolactone          | C7 H12 O4  | + 6.17  | 7.6E+06  | 162.0456  | 162.0447  | 99.0436,85.0281,83.0525,55.0540                                              |
| 168 | 347 C44   | phenolic acids, 5-Hydroxy-4-methoxy-2-hydroxy-2H-pyran-2-one      | C6 H8 O4   | + 3.10  | 2.01E+07 | 145.0495  | 145.0489  | 127.0385,99.0437,85.0281,71.0486                                             |
| 169 | 355 C45   | phenolic acids, 2,5-Bis(hydroxymethyl)furan                       | C6 H8 O3   | + 22.61 | 5.07E+08 | 129.0546  | 129.0539  | 111.0435                                                                     |
| 170 | 356 C46   | phenolic acids, 3,5-Dihydroxy-2-hydroxymethyl-4H-pyran-4-one      | C6 H8 O5   | + 2.44  | 1.63E+06 | 159.0288  | 159.0281  | 141.0716,113.0228,85.0283,67.0175,55.0176                                    |
| 171 | 359 C47   | phenolic acids, Knic acid                                         | C6 H8 O4   | + 4.34  | 3.37E+07 | 143.0339  | 143.0332  | 125.0277,115.0384,87.0436,83.0488,63.0320                                    |
| 172 | 365 C48   | phenolic acids, 5-Hydroxymethyl-2-furaldehyde                     | C6 H8 O3   | + 6.35  | 2.90E+07 | 127.0390  | 127.0384  | 109.0643,99.0436,97.0280,81.0331,53.0383                                     |
| 173 | 379 C49   | phenolic acids, MFC00177095                                       | C6 H4 O4   | + 2.48  | 3.36E+06 | 141.0182  | 141.0175  | 123.0071,113.0228,97.0280,95.0173,81.0321,85.0280,55.0176                    |
| 174 | 385 C50   | phenolic acids, 4-Oxo-4H-pyran-2-carbaldehyde                     | C6 H4 O3   | + 2.62  | 3.7E+06  | 125.0233  | 125.0227  | 97.0279,83.0124,69.0332,53.0310                                              |
| 175 | 391 C51   | phenolic acids, Furo[3,2-b]furan-2,5-dione                        | C6 H2 O4   | + 2.10  | 9.28E+05 | 139.0026  | 139.0019  | 111.071,95.0123,68.9968,55.0176                                              |
| 176 | 443 C52   | phenolic acids, Antioxidant CA                                    | C37 H52 O3 | + 19.91 | 1.17E+08 | 545.3999  | 545.3999  | 55.0539                                                                      |
| 177 | 456 C53   | phenolic acids, 3-Hydroxy-5-oxo-5-(tetradecyloxy)-3-itetradecol   | C34 H64 O7 | + 19.60 | 1.26E+07 | 585.4725  | 585.4733  | 97.1007,87.0437,85.1008,83.0852,73.0645,71.0852,69.0696,57.0696              |
| 178 | 558 C54   | phenolic acids, 5-(2S,3S)-6-Hydroxy-2-(4-hydroxyhexenyl)-4-ite    | C28 H52 O8 | + 18.57 | 1.19E+07 | 455.4498  | 455.447   | 199.0744,138.0883,133.0728,123.1425,107.0487,95.0487                         |
| 179 | 583 C55   | phenolic acids, C1267                                             | C26 H54 O8 | + 16.44 | 9.32E+07 | 496.3991  | 496.3987  | 221.1374,177.1114,133.0854,89.0593,71.0852,57.0696                           |
| 180 | 617 C56   | phenolic acids, C1266                                             | C24 H50 O7 | + 16.44 | 8.14E+07 | 451.3629  | 451.3614  | 195.1219,177.1114,133.0853,89.0593,71.0852,57.0696                           |
| 181 | 619 C57   | phenolic acids, 2106657                                           | C24 H42    | + 13.65 | 3.29E+07 | 331.3359  | 331.3380  | 135.1161,121.1006,97.1006,93.0695,85.1008,79.0538,57.0696                    |
| 182 | 631 C58   | phenolic acids, MFC00206373                                       | C24 H38 O4 | + 20.52 | 3.15E+08 | 391.2843  | 391.2827  | 179.0695,167.0331,153.0539,137.0590,71.0852,57.0696                          |
| 183 | 657 C59   | phenolic acids, 2-Arachidonyl glycerol                            | C23 H38 O4 | + 13.83 | 2.42E+06 | 379.2843  | 379.2827  | 133.1006,121.1006,109.1007,107.0850,95.0851,87.0437                          |
| 184 | 661 C60   | phenolic acids, 5-(8R)-8-Hexadecen-1-yl-1,3-benzenediol           | C23 H38 O2 | + 22.28 | 1.16E+07 | 347.2945  | 347.2929  | 235.1684,179.1058,165.0098,163.0746,161.0596,151.0747,123.0436,83.0852       |
| 185 | 680 C61   | phenolic acids, 4-(5,5-dimethyl-1,3-dioxan-2-yl)-4'-heptylbutyr   | C23 H38 O3 | + 19.59 | 2.38E+07 | 361.2737  | 361.2720  | 175.1108,161.0953,159.0795,129.0693,91.0538,69.0696,57.0696                  |
| 186 | 718 C62   | phenolic acids, C1267                                             | C22 H38 O2 | + 18.44 | 1.74E+08 | 333.2748  | 333.2744  | 125.0520,89.0593,71.0852,57.0696                                             |
| 187 | 727 C63   | phenolic acids, MFC00038340                                       | C22 H38 O2 | + 18.44 | 1.74E+08 | 333.2748  | 333.2744  | 151.0746,125.0591,109.0643,107.0486,83.0851,69.0695,55.0540                  |
| 188 | 740 C64   | phenolic acids, Docosapentaenoic acid                             | C22 H34 O2 | + 13.11 | 1.01E+07 | 331.2632  | 331.2617  | 147.1162,133.1006,121.1006,107.0851,95.0851,83.0895,67.0539,55.0540          |
| 189 | 786 C65   | phenolic acids, 1-Linolol alcohol                                 | C21 H38 O4 | + 18.08 | 1.82E+07 | 355.2843  | 355.2826  | 175.1474,147.1162,135.1163,123.1163,109.1007,95.0851,81.0695,67.0539         |
| 190 | 812 C66   | phenolic acids, 5-(2-Phenyl-8-ethylbenzene-1,3-diol               | C21 H24 O2 | + 8.5   | 1.35E+06 | 281.1213  | 281.1207  | 179.059,165.0902,151.0747,137.0591,123.0435,69.0695,55.0540                  |
| 191 | 825 C67   | phenolic acids, 5-(8Z-11Z)-penta-deca-8,11-dien-1-yl-benzene-     | C21 H32 O2 | + 16.54 | 1.22E+07 | 317.2475  | 317.2460  | 177.0902,163.0746,149.0590,137.0591,123.0435,83.0852                         |
| 192 | 889 C68   | phenolic acids, Ethyl oleate                                      | C20 H38 O2 | + 11.61 | 1.15E+06 | 311.2945  | 311.2929  | 149.0954,137.0955,125.0955,107.0850,95.0851,81.0695,67.0539,55.0540          |
| 193 | 911 C69   | phenolic acids, Ethyl linoleate                                   | C20 H36 O2 | + 20.50 | 4.42E+06 | 309.2788  | 309.2774  | 161.1318,147.1162,133.1006,109.1007,95.0851,81.0695,69.0696                  |
| 194 | 946 C70   | phenolic acids, 8Z,12Z-1,4-Eicosatrienoic acid                    | C20 H34 O2 | + 14.16 | 5.21E+06 | 307.2616  | 307.2616  | 109.0643,95.0488,69.0695,55.0540                                             |
| 195 | 964 C71   | phenolic acids, 2KCD01887                                         | C20 H32 O2 | + 15.66 | 1.35E+06 | 303.2463  | 303.2463  | 95.0851,83.0852,69.0696,67.0539,55.0540                                      |
| 196 | 1072 C72  | phenolic acids, PROPYLENEGLYCOLDIOCTANOATE                        | C19 H36 O4 | + 15.98 | 7.83E+06 | 329.2686  | 329.2673  | 117.0541,85.0281,61.0281,57.0332                                             |
| 197 | 1078 C73  | phenolic acids, 6132055                                           | C19 H36 O3 | + 19.31 | 4.59E+07 | 313.2737  | 313.2732  | 125.1319,111.1163,97.1007,85.1008,71.0852,57.0696                            |
| 198 | 1181 C74  | phenolic acids, (+)-[2(13)-DIHOME                                 | C18 H34 O4 | + 19.38 | 1.09E+07 | 315.2530  | 315.2514  | 111.0799,109.1007,101.0593,97.0644,95.0851,83.0852,57.0696                   |
| 199 | 1189 C75  | phenolic acids, 1,2-Di(2-hydroxybutyl)benzoyl-beta-D-glucop       | C18 H32 O2 | + 19.38 | 1.09E+07 | 293.2126  | 293.2126  | 165.1627,155.1424,141.1268,111.1164,97.1008,71.0852,57.0696                  |
| 200 | 1250 C76  | phenolic acids, Kogonol H                                         | C18 H20 O  | + 20.20 | 9.63E+06 | 265.2526  | 265.2513  | 153.1267,139.1111,125.0955,111.0799,97.0643,71.0852,57.0696                  |
| 201 | 1265 C77  | phenolic acids, NP-001445                                         | C18 H30 O5 | + 14.62 | 4.40E+07 | 327.2166  | 327.2151  | 169.0851,155.0695,127.0384,109.1007,95.0851,69.0696                          |
| 202 | 1279 C78  | phenolic acids, 9-Oxo-10E,12E)-octadecadienoic acid               | C18 H30 O3 | + 10.94 | 8.20E+07 | 295.2250  | 295.2250  | 179.1421,151.1110,111.0799,99.0800,71.0852,57.0696                           |
| 203 | 1286 C79  | phenolic acids, Phindelic acid                                    | C18 H30 O2 | + 12.76 | 2.60E+07 | 279.2319  | 279.2305  | 137.1320,111.1163,97.1008,57.0696                                            |
| 204 | 1324 C80  | phenolic acids, 3,4-Dihydro-8-octyl-(12H)-naphthalene             | C18 H28 O2 | + 19.47 | 2.74E+06 | 299.2091  | 299.2086  | 189.1628,147.0797,133.1006,119.0850,109.1006,91.0538                         |
| 205 | 1342 C81  | phenolic acids, 4,4'-Disopropylbiphenyl                           | C18 H22    | + 10.56 | 1.33E+06 | 239.1794  | 239.1787  | 197.1315,119.0850,105.0694,77.0381                                           |
| 206 | 1381 C82  | phenolic acids, Ethyl 2,5-dimethoxy-1H-oxobenzeneheptanoate       | C17 H24 O5 | + 11.72 | 5.59E+06 | 309.16605 | 309.16827 | 179.1422,165.0539,155.1059,139.1111,137.0591,107.0487                        |
| 207 | 1403 C83  | phenolic acids, Palmitic acid                                     | C16 H32 O2 | + 16.41 | 8.25E+06 | 287.2475  | 287.2463  | 61.0281                                                                      |
| 208 | 1438 C84  | phenolic acids, 2-(2-hydroxyethyl)-2-oxo-3-oxopentanoate          | C16 H28 O5 | + 13.30 | 3.48E+07 | 293.2126  | 293.2126  | 159.1110,137.1318,111.0799,97.1007,69.0695                                   |
| 209 | 1460 C85  | phenolic acids, Benzo-18-crown-6                                  | C16 H24 O6 | + 9.58  | 9.48E+05 | 313.1646  | 313.1631  | 163.0745,137.0591,119.0486,115.0747,71.0488,59.0489                          |
| 210 | 1466 C86  | phenolic acids, NP-004038                                         | C16 H24 O3 | + 8.40  | 1.73E+06 | 265.1798  | 265.1786  | 191.1058,175.1472,153.0903,151.0746                                          |
| 211 | 1467 C87  | phenolic acids, 10-Phenyldecane                                   | C16 H24 O2 | + 11.13 | 6.68E+06 | 249.1849  | 249.1838  | 133.1420,175.1473,147.1161,133.1005,139.1111,97.0643                         |
| 212 | 1508 C88  | phenolic acids, 1,2-Di(2-hydroxybutyl)benzoyl-beta-D-glucop       | C16 H24 O2 | + 11.13 | 6.68E+06 | 249.1849  | 249.1838  | 219.0642,209.0435,197.0437,177.0539,133.0728,111.0498,55.0540                |
| 213 | 1607 C89  | phenolic acids, 19-NONANEDIOL DIACRYLATE                          | C15 H24 O4 | + 10.47 | 5.19E+06 | 269.1747  | 269.1734  | 195.1370,167.1058,155.1059,141.0902,123.1162,83.0852,69.0696                 |
| 214 | 1694 C90  | phenolic acids, Gemfibrozil                                       | C15 H22 O3 | + 9.78  | 8.61E+06 | 251.1642  | 251.1631  | 205.1577,149.0954,123.0799,105.0694,87.0437,69.0332                          |
| 215 | 1705 C91  | phenolic acids, 3,5-di-tert-butyl-4-hydroxybenzaldehyde           | C15 H22 O2 | + 9.57  | 2.74E+07 | 235.1693  | 235.1681  | 207.1736,179.1058,161.0954,151.1110,57.0697                                  |
| 216 | 1708 C92  | phenolic acids, 4-Octylbenzaldehyde                               | C15 H22 O2 | + 8.73  | 3.76E+07 | 219.1743  | 219.1733  | 191.1786,121.0643,107.0487,91.0538,57.0696                                   |
| 217 | 1709 C93  | phenolic acids, 1,8-Cyclopentadecadiene                           | C15 H26 O  | + 8.83  | 8.61E+06 | 217.1589  | 217.1579  | 175.1109,161.0955,153.1006,125.0956,119.0851,91.0539,83.0489,55.0540         |
| 218 | 1745 C94  | phenolic acids, Turmerone                                         | C15 H20 O  | + 8.83  | 8.61E+06 | 217.1589  | 217.1579  | 145.1094,131.0849,123.1162,111.0799,105.0694,97.1006,91.0538,71.0852,57.0696 |
| 219 | 1748 C95  | phenolic acids, (1E,3D)-1,3-Nonadien-1-ylbenzene                  | C15 H18 O  | + 8.72  | 2.08E+07 | 201.16377 | 201.16309 | 163.0746,137.0591,119.0486,105.0694,91.0538,83.0852,67.0539                  |
| 220 | 1773 C96  | phenolic acids, Losoxifenol                                       | C15 H18 O3 | + 8.63  | 4.75E+07 | 247.13287 | 247.13197 | 191.1786,121.0643,107.0487,91.0538,57.0696                                   |
| 221 | 1781 C97  | phenolic acids, 4-methoxy-6-(2-(4-methoxyphenyl)ethyl)-20H-       | C15 H16 O4 | + 8.83  | 8.61E+06 | 217.1589  | 217.1579  | 175.1109,161.0955,153.1006,125.0956,119.0851,91.0539,83.0489,55.0540         |
| 222 | 1783 C98  | phenolic acids, bisphenol A                                       | C15 H16 O2 | + 8.65  | 1.99E+07 | 229.1223  | 229.12143 | 211.1116,135.0799                                                            |
| 223 | 1874 C99  | phenolic acids, MFC00014547                                       | C14 H22 O3 | + 9.51  | 7.17E+06 | 239.16417 | 239.16319 | 193.1579,141.0903,127.0384,85.0281,71.0853                                   |
| 224 | 1884 C100 | phenolic acids, NP-002040                                         | C14 H20 O3 | + 9.25  | 2.50E+07 | 237.1485  | 237.1475  | 181.0850,177.1265,163.0746,95.0851                                           |
| 225 | 1905 C101 | phenolic acids, 4,4'-Bis(hydroxy)-4'-oxobutanoic acid             | C14 H20 O2 | + 8.59  | 2.78E+07 | 233.1485  | 233.1478  | 205.1213,165.0903,97.0643,95.0847,59.0489                                    |
| 226 | 1909 C102 | phenolic acids, 2-Pentyl-1-midanone                               | C14 H18 O  | + 10.09 | 1.47E+07 | 203.1430  | 203.1420  | 153.1006,105.0694,91.0538                                                    |
| 227 | 1916 C103 | phenolic acids, (2S,4R,5S,6S,7R)-5,6,12,14-tetrahydroxy-4-hydrox  | C14 H16 O9 | + 4.56  | 5.24E+08 | 329.0867  | 329.0855  | 207.0642,197.0435,139.0384,85.0280,69.0332                                   |
| 228 | 1941 C104 | phenolic acids, 1,1,8,8-tetrahydroxy-3,6-dimethyl-2-naphthylethan | C14 H14 O3 | + 10.45 | 3.43E+06 | 231.1016  | 231.1006  | 187.0746                                                                     |
| 229 | 1989 C105 | phenolic acids, 4-Oxotetradecanoic acid                           | C14 H26 O2 | + 8.39  | 1.41E+07 | 211.1683  | 211.1668  | 193.1578,133.1006,111.0493,109.1007,95.0851,67.0539                          |
| 230 | 2014 C106 | phenolic acids, NP-007909                                         | C13 H20 O3 | + 6.70  | 2.38E+07 | 225.1485  | 225.1476  | 207.1370,125.0591,123.1163,109.1007,95.0851,83.0852,69.0696                  |
| 231 | 2044 C107 | phenolic acids, Heptylbenzene                                     | C13 H26 O  | + 9.26  | 2.67E+06 | 177.1638  | 177.1629  | 135.1162,121.1006,93.0694,79.0538,97.1006                                    |
| 232 | 2052 C108 | phenolic acids, 1-(3-ethyl-2,4-dihydroxy-6-methoxyphenyl)buta     | C13 H18 O4 | + 8.78  | 9.92E+06 | 239.1278  | 239.1268  | 153.0799,111.0436,105.0694,83.0488,55.0540                                   |
| 233 | 2063 C109 | phenolic acids, Hexyloxybenzoic acid                              | C13 H18 O3 | + 6.68  | 2.07E+07 | 223.1329  | 223.1320  | 205.1213,165.0903,97.0643,95.0847,59.0489                                    |
| 234 | 2068 C110 | phenolic acids, Hexapentenoic acid                                | C13 H18 O1 | + 9.09  | 3.97E+07 | 235.1430  | 235.1421  | 133.1006,105.0694,91.0538                                                    |
| 235 | 2091 C111 | phenolic acids, 1-(4-hydroxy-3-(3-methylbut-2-en-1-yl)phenyl)     | C13 H16 O2 | + 6.66  | 9.29E+06 | 205.1223  | 205.1216  | 163.1109,145.1005,135.1162,121.0642,107.0850,105.0694,91.0538                |
| 236 | 2097 C112 | phenolic acids, Cyclohexyl phenyl ketone                          | C13 H16 O  | + 6.69  | 3.46E+07 | 189.1274  | 189.1264  | 159.0797,143.0848,131.0849,117.0693,91.0538                                  |
| 237 | 2103 C113 | phenolic acids, 4-Pentylphenylacetylene                           | C13 H16    | + 10.88 | 8.52E+06 | 173.1325  | 173.1316  | 143.0849,117.0693,95.0338,67.0539                                            |
| 238 | 2117 C114 | phenolic acids, (2S)-5-Methoxy-2-methyl-2,3,8,9-tetrahydro-4H-    | C13 H16 O4 | + 8.65  | 1.00E+07 | 225.0685  | 225       |                                                                              |

| MS  | Site | Compound category | Name                                                                           | Formula                                                                                               | Ion mode  | RT    | Response | theoretical val | Measured value | MS/MS                                                 |                                                                      |
|-----|------|-------------------|--------------------------------------------------------------------------------|-------------------------------------------------------------------------------------------------------|-----------|-------|----------|-----------------|----------------|-------------------------------------------------------|----------------------------------------------------------------------|
| 1   | 4    | phenylpropanoid   | 3,5,7-Trihydroxy-4H-chromen-4-one                                              | C18H05O5                                                                                              | +         | 2.69  | 2,48E+07 | 95.0288         | 195.0279       | 177.0173,149.0226,135.0434,123.0435,109.0279          |                                                                      |
| 2   | 2    | 8                 | phenylpropanoid                                                                | Umbelliferone                                                                                         | C9H6O3    | +     | 4.42     | 8,69E+06        | 163.0390       | 163.0382                                              | 145.0277,123.0434,109.0279,93.0330,55.0176                           |
| 3   | 15   | phenylpropanoid   | Coumarin                                                                       | C9H6O2                                                                                                | +         | 5.21  | 1,20E+06 | 147.0441        | 147.0433       | 119.0485,107.0486,103.0537,77.0382                    |                                                                      |
| 4   | 376  | phenylpropanoid   | Actigargin-1                                                                   | C21H24O6                                                                                              | +         | 7.94  | 2,57E+06 | 373.1646        | 373.1626       | 373.1626                                              |                                                                      |
| 5   | 610  | phenylpropanoid   | 4-(3R,4S)-4-(2E)-3-(3,4-dihydroxyphenyl)propan-2-one                           | C14H14O4                                                                                              | +         | 9.38  | 1,02E+04 | 255.1024        | 255.1027       | 183.0486,163.0392,135.0434,85.0280                    |                                                                      |
| 6   | 827  | phenylpropanoid   | Diethyl benzalacetate                                                          | C14H16O4                                                                                              | +         | 9.49  | 1,20E+07 | 249.1121        | 249.1110       | 203.0694,189.0901,175.0538,161.0590,147.0434,91.0538  |                                                                      |
| 7   | 925  | phenylpropanoid   | CHEMRRD-BA 6367113                                                             | C13H14O3                                                                                              | +         | 9.72  | 1,25E+07 | 219.1016        | 219.1006       | 201.0902,191.1057,123.0435,107.0487                   |                                                                      |
| 8   | 1012 | phenylpropanoid   | 7-Hydroxy-4-propylcoumarin                                                     | C12H12O3                                                                                              | +         | 12.91 | 1,77E+07 | 205.0859        | 205.0852       | 177.0903,163.0745,109.0279                            |                                                                      |
| 9   | 1014 | phenylpropanoid   | 6,7-Dihydroxy-4-methyl-2-oxo-2H-chromen-3-ylidene                              | C12H10O6                                                                                              | +         | 4.62  | 1,44E+08 | 251.0550        | 251.0542       | 191.0329,177.0537,135.0433,71.0121                    |                                                                      |
| 10  | 1102 | phenylpropanoid   | 7-Dihydroxy-4-methyl-2-oxo-2H-chromen-3-ylidene                                | C12H10O6                                                                                              | +         | 4.62  | 1,44E+08 | 251.0550        | 251.0542       | 191.0329,177.0537,135.0433,71.0121                    |                                                                      |
| 11  | 1108 | phenylpropanoid   | 6-Methoxy-4-oxo-4H-chromene-2-carboxylic acid                                  | C11H8O5                                                                                               | +         | 4.60  | 8,20E+06 | 221.0444        | 221.0436       | 193.0466,177.0538,175.0383,149.0649,123.0434,107.0486 |                                                                      |
| 12  | 1080 | phenylpropanoid   | Scopalone                                                                      | C11H10O4                                                                                              | +         | 4.42  | 1,07E+07 | 207.0652        | 207.0646       | 179.0693,175.0383,165.0538                            |                                                                      |
| 13  | 1085 | phenylpropanoid   | 4,6-Dihydroxy-3-oxo-1,3-dihydro-2-benzofuran-1-one                             | C10H8O6                                                                                               | +         | 4.60  | 7,82E+06 | 225.0394        | 225.0385       | 207.0279,181.0488,179.0330,165.0173,137.0225,109.0279 |                                                                      |
| 14  | 1087 | phenylpropanoid   | Fraxetin                                                                       | C10H8O5                                                                                               | +         | 4.62  | 8,27E+07 | 209.0444        | 209.0437       | 191.0329,181.0485,177.0173,165.0538                   |                                                                      |
| 15  | 1095 | phenylpropanoid   | Scopuletone                                                                    | C10H8O4                                                                                               | +         | 4.42  | 1,07E+07 | 207.0652        | 207.0646       | 179.0693,175.0383,165.0538                            |                                                                      |
| 16  | 1099 | phenylpropanoid   | hymecromone                                                                    | C10H8O3                                                                                               | +         | 4.55  | 2,56E+06 | 177.0546        | 177.0537       | 149.0589,109.0279,93.0331                             |                                                                      |
| 17  | 1104 | phenylpropanoid   | 2-oxo-2H-chromene-3-carboxylic acid                                            | C10H6O4                                                                                               | +         | 4.60  | 1,47E+07 | 191.0339        | 191.0329       | 163.0381,147.0435,145.0277,105.0330                   |                                                                      |
| 18  | 1176 | phenylpropanoid   | (E)-2-Methoxycinnamaldehyde                                                    | C10H10O2                                                                                              | +         | 4.53  | 2,37E+06 | 163.0754        | 163.0747       | 131.0485,121.1006,107.0486,91.0538,77.0382,55.0176    |                                                                      |
| 19  | 31   | phenylpropanoid   | 2-Phenyl-1-propanol                                                            | C9H12O                                                                                                | +         | 8.04  | 7,94E+06 | 137.0961        | 137.0954       | 119.0849,107.0486,105.0694,91.0538,77.0383,55.0176    |                                                                      |
| 20  | 43   | phenylpropanoid   | 4-Hydroxy-3-methoxybenzoic acid                                                | C9H8O4                                                                                                | +         | 4.42  | 1,07E+07 | 183.0746        | 183.0738       | 123.0798,105.0694,91.0538,77.0383,55.0176             |                                                                      |
| 111 | 21   | 1011              | phenylpropanoid                                                                | 3-(2-Methoxyphenyl)-5-oxotetrahydro-3-furancarbaldehyde                                               | C12H12O5  | +     | 6.34     | 1,75E+06        | 237.0758       | 237.0748                                              | 163.0746,137.0591,121.0949,106.0643,85.0280                          |
| 21  | 210  | terpene           | Oleonic acid benzoate                                                          | C37H52O4                                                                                              | +         | 16.47 | 2,13E+08 | 561.3938        | 561.3947       | 561.3947                                              |                                                                      |
| 22  | 233  | terpene           | Ursolic acid                                                                   | C30H48O3                                                                                              | +         | 10.19 | 1,99E+06 | 457.3676        | 457.3668       | 181.1215,163.1477,95.0850,55.0539                     |                                                                      |
| 23  | 241  | terpene           | 18,5,8,5,10S,13S,17S,20R,10D-10-hydroxy-4,5,9,9-tetrahydronaphthalene-1,2-diol | C30H46O3                                                                                              | +         | 10.98 | 2,0E+07  | 455.5520        | 455.5500       | 301.2158,193.1216,179.0137,171.3818,95.0851,55.0540   |                                                                      |
| 24  | 651  | terpene           | 1,2-Dihydroxy-4-methyl-2-oxo-2H-chromen-3-ylidene                              | NP-0049                                                                                               | +         | 4.62  | 1,44E+08 | 251.0550        | 251.0542       | 191.0329,177.0537,135.0433,71.0121                    |                                                                      |
| 25  | 5    | 281               | terpene                                                                        | 1,4-dihydroxy-1,4-dimethyl-7-(propan-2-ylidene)-2,5-dimethyl-2,5-dihydro-3H-pyran-3-one               | C15H24O4  | +     | 7.35     | 1,91E+06        | 253.1796       | 253.1786                                              | 199.1472,169.1267,171.265,175.1472,125.0954,111.0799,81.0695,67.0539 |
| 26  | 6    | 661               | terpene                                                                        | (c)-Caryophyllene oxide                                                                               | C15H24O   | +     | 9.30     | 2,40E+06        | 221.1900       | 221.1892                                              | 193.1584,177.1628,163.1474,116.1213,112.1162,106.090                 |
| 27  | 7    | 720               | terpene                                                                        | (8aR,8iR,8aR,8iR)-8-Hydroxy-8a-methyl-3,5-bis(methyl-4-hydroxy-4-methylphenyl)cyclohex-3-ene-1,4-diol | C18H22O2  | +     | 8.17     | 1,04E+07        | 211.1693       | 211.1685                                              | 175.1472,151.1474,109.1008,83.0689,69.0695,55.0540                   |
| 28  | 8    | 863               | terpene                                                                        | 2-(1E)-1-Buten-3-yn-1-yl-1,3,3-trimethylcyclohex-1-ene-1,2-diol                                       | C18H22O2  | +     | 8.17     | 1,04E+07        | 211.1693       | 211.1685                                              | 175.1472,151.1474,109.1008,83.0689,69.0695,55.0540                   |
| 30  | 10   | 902               | terpene                                                                        | 2-((1E)-1-Buten-3-yn-1-yl)-1,3,3-trimethylcyclohex-1-ene-1,2-diol                                     | C18H22O2  | +     | 8.16     | 2,08E+06        | 175.1481       | 175.1472                                              | 147.1160,133.1055,110.0949,105.0693,91.0538,83.0689,69.0695          |
| 31  | 11   | 141               | terpene                                                                        | NP-019547                                                                                             | C17H26O5  | +     | 16.23    | 8,15E+05        | 309.1707       | 309.1708                                              | 101.0228,90.0129                                                     |
| 32  | 12   | 838               | terpene                                                                        | 3F48                                                                                                  | C13H24O3  | +     | 12.33    | 1,18E+06        | 229.1789       | 229.1789                                              | 155.1423,99.0436,95.0851,71.0852,57.0696                             |
| 323 | 13   | 1125              | steroid                                                                        | Pulsagon                                                                                              | C20H32O6  | +     | 8.16     | 1,53E+04        | 153.1274       | 153.1266                                              | 125.0954,97.0643,91.0538,77.0383,55.0176                             |
| 32  | 1    | 59                | quinone                                                                        | 2-Ethynyl-1,4-benzoquinone                                                                            | C8H4O2    | +     | 4.40     | 1,65E+06        | 133.0284       | 133.0278                                              | 101.0340,105.0695,85.0546,71.0487,59.0487,57.0332                    |
| 2   | 539  | quinone           | Embelin                                                                        | C17H26O4                                                                                              | +         | 11.79 | 2,17E+06 | 295.1904        | 295.1990       | 125.0225,101.0228,85.0546,71.0380,71.0852,57.0332     |                                                                      |
| 35  | 3    | 101               | quinone                                                                        | 2,5,8-Tetrahydroxy-1,4-naphthoquinone                                                                 | C10H6O6   | +     | 4.60     | 1,91E+06        | 223.0237       | 223.0229                                              | 179.0332,167.0694,153.0718,15.0282,15.0227                           |
| 36  | 4    | 106               | quinone                                                                        | 6-AVACIN                                                                                              | C10H6O5   | +     | 4.60     | 2,07E+06        | 207.0746       | 207.0738                                              | 179.0330,163.0392,151.0384,133.0683,109.0279,93.0331                 |
| 38  | 1    | 1106              | quinone                                                                        | Lawson                                                                                                | C10H6O3   | +     | 6.83     | 1,26E+06        | 175.0390       | 175.0381                                              | 131.0484,119.0486,105.0328,103.0537,77.0383                          |
| 39  | 1    | 379               | flavonoid                                                                      | Astibin                                                                                               | C21H22O11 | +     | 5.66     | 9,91E+05        | 451.1235       | 451.1214                                              | 451.1214                                                             |
| 39  | 2    | 380               | flavonoid                                                                      | Myricitrin                                                                                            | C21H22O12 | +     | 7.27     | 5,11E+06        | 465.1028       | 465.1005                                              | 465.1005                                                             |
| 40  | 3    | 617               | flavonoid                                                                      | NP-000924                                                                                             | C16H14O5  | +     | 10.78    | 6,45E+05        | 287.0914       | 287.0900                                              | 167.0332,139.0384,121.0717,109.0487,93.0330                          |
| 41  | 4    | 745               | flavonoid                                                                      | 1-Fustin                                                                                              | C15H12O5  | +     | 6.69     | 1,6E+07         | 289.0710       | 289.0702                                              | 177.0330,153.0539,149.0227,137.0228,127.0384,109.0279,93.0330        |
| 42  | 5    | 756               | flavonoid                                                                      | Quercetin                                                                                             | C15H10O7  | +     | 9.08     | 2,70E+07        | 303.0499       | 303.0485                                              | 165.0174,153.0174,137.0226,125.0223,13.0435,109.0280                 |
| 43  | 6    | 758               | flavonoid                                                                      | Kaempferol                                                                                            | C15H10O6  | +     | 9.78     | 3,09E+06        | 287.0550       | 287.0546                                              | 167.0330,151.0384,139.0383,123.0434,121.0277,111.0435,103.0539       |
| 44  | 7    | 761               | flavonoid                                                                      | Apigenin                                                                                              | C15H10O5  | +     | 5.68     | 1,06E+07        | 271.0601       | 271.0588                                              | 153.0176,125.0277,109.0486,109.0279,93.0339                          |
| 45  | 1    | 17                | phenolic acids, carb                                                           | 1H-Isobutene-1,3,4-trione                                                                             | C9H4O4    | +     | 3.69     | 7,78E+06        | 177.01823      | 177.0174                                              | 149.0226,133.0718,121.0279,93.0331,55.0228                           |
| 46  | 2    | 35                | phenolic acids, carb                                                           | 7-ethyl salicylate                                                                                    | C10H10O3  | +     | 4.42     | 1,07E+07        | 183.0746       | 183.0738                                              | 123.0798,105.0694,91.0538,77.0383,55.0176                            |
| 47  | 3    | 38                | phenolic acids, carb                                                           | 3,4-Dimethoxybenzoic acid                                                                             | C9H10O4   | +     | 8.65     | 4,14E+06        | 183.0618       | 183.0643                                              | 155.0695,137.0590,123.0434,93.0329,77.0382                           |
| 48  | 4    | 47                | phenolic acids, carb                                                           | 2145                                                                                                  | C8H8O2    | +     | 9.63     | 3,11E+06        | 137.0597       | 137.0599                                              | 109.0642,91.0538,77.0383,51.0227                                     |
| 49  | 5    | 52                | phenolic acids, carb                                                           | Phenylglyoxylic acid                                                                                  | C8H6O3    | +     | 10.7     | 3,11E+06        | 151.0387       | 151.0382                                              | 135.0434,105.0329,91.0538,77.0383,51.0226                            |
| 50  | 6    | 54                | phenolic acids, carb                                                           | 2145                                                                                                  | C8H8O2    | +     | 9.63     | 3,11E+06        | 137.0597       | 137.0599                                              | 109.0642,91.0538,77.0383,51.0227                                     |
| 51  | 7    | 57                | phenolic acids, carb                                                           | Coumarandione                                                                                         | C8H4O3    | +     | 12.91    | 4,39E+07        | 149.0232       | 149.0226                                              | 121.0278,93.0330                                                     |
| 52  | 8    | 67                | phenolic acids, carb                                                           | 2347                                                                                                  | C8H14O2   | +     | 6.68     | 7,81E+06        | 143.1065       | 143.1057                                              | 125.0956,97.0077,84.0368,83.0689,69.0695,55.0540                     |
| 53  | 9    | 73                | phenolic acids, carb                                                           | NP-019360                                                                                             | C8H12O4   | +     | 11.18    | 1,01E+07        | 173.08083      | 173.0801                                              | 113.0591,89.0229,81.0695,71.0124,67.0537,66.0696                     |
| 54  | 10   | 76                | phenolic acids, carb                                                           | Tetrahydro-2-furfuryl acrylate                                                                        | C12H12O3  | +     | 11.18    | 1,01E+07        | 173.08083      | 173.0801                                              | 113.0591,89.0229,81.0695,71.0124,67.0537,66.0696                     |
| 55  | 11   | 78                | phenolic acids, carb                                                           | Dimesone                                                                                              | C8H12O2   | +     | 9.52     | 8,22E+05        | 141.0911       | 141.0905                                              | 141.0902,95.0851,81.0331,53.0383                                     |
| 56  | 12   | 79                | phenolic acids, carb                                                           | ox-dihomoacetic acid                                                                                  | C8H10O6   | +     | 9.07     | 1,10E+06        | 203.0501       | 203.0542                                              | 139.0019,129.0504,101.0228,83.0324,67.0589,55.0540                   |
| 57  | 13   | 85                | phenolic acids, carb                                                           | Tyrosol                                                                                               | C8H10O2   | +     | 3.83     | 2,71E+06        | 139.07535      | 139.0747                                              | 121.0277,111.0435,93.0331,77.0382,51.0227                            |
| 58  | 14   | 88                | phenolic acids, carb                                                           | 20330                                                                                                 | C7H6O4    | +     | 10.89    | 2,17E+06        | 157.04953      | 157.0486                                              | 113.0228,97.0133,93.0386,67.0101                                     |
| 59  | 15   | 88                | phenolic acids, carb                                                           | Gallic acid                                                                                           | C7H6O5    | +     | 8.83     | 2,19E+06        | 171.02879      | 171.027                                               | 153.0175,125.0273,125.0273,93.0331,55.0227                           |
| 60  | 16   | 95                | phenolic acids, carb                                                           | Salicylic acid                                                                                        | C7H6O3    | +     | 3.78     | 3,42E+06        | 139.03879      | 139.0384                                              | 121.078,109.0278,93.0331,77.0382,51.0227                             |
| 61  | 17   | 100               | phenolic acids, carb                                                           | D-pinitol                                                                                             | C7H14O4   | +     | 1.55     | 9,66E+06        | 159.08631      | 159.08551                                             | 141.0540,85.0281,71.0489,57.0333                                     |
| 62  | 18   | 101               | phenolic acids, carb                                                           | Butyl salicylate                                                                                      | C11H14O3  | +     | 8.89     | 2,45E+06        | 181.10157      | 181.10094                                             | 115.0383,93.0386,73.0383,55.0176                                     |
| 63  | 19   | 108               | phenolic acids, carb                                                           | Ethyl octanoate                                                                                       | C11H20O2  | +     | 1.16     | 5,48E+06        | 159.05618      | 159.05618                                             | 141.0539,127.0383,113.0591,89.0286,85.0280,71.0488                   |
| 64  | 20   | 119               | phenolic acids, carb                                                           | 5-hydroxy-4-methoxy-5,6-dihydro-2H-pyran-2-one                                                        | C8H8O4    | +     | 6.21     | 3,67E+07        | 145.0493       | 145.0499                                              | 127.0384,99.0436,97.0280,85.0369,63.0332,55.0176                     |
| 65  | 21   | 130               | phenolic acids, carb                                                           | Koic acid                                                                                             | C6H6O4    | +     | 4.34     | 8,16E+06        | 140.03388      | 143.0332                                              | 125.0227,115.0385,85.0644,69.0332,55.0020                            |
| 66  | 22   | 134               | phenolic acids, carb                                                           | Phloroglucinol                                                                                        | C6H4O3    | +     | 9.53     | 6,67E+07        | 127.03383      | 129.0278                                              | 109.0278                                                             |
| 67  | 23   | 135               | phenolic acids, carb                                                           | Adipic acid                                                                                           | C6H10O4   | +     | 12.37    | 4,74E+06        | 147.05818      | 147.056                                               | 129.0540,111.0435,101.0592,83.0538                                   |
| 68  | 24   | 182               | phenolic acids, carb                                                           | Monomethyl succinate                                                                                  | C5H8O4    | +     | 4.9      | 5,28E+06        | 133.04953      | 133.0449                                              | 115.0384,101.0287,94.036,73.0281,57.0332                             |
| 69  | 25   | 196               | phenolic acids, carb                                                           | pentane-1,2,3,4,5-pentol                                                                              | C5H12O5   | +     | 1.54     | 1,31E+06        | 153.0755       | 153.0575                                              | 135.0646,117.0541,99.0436,69.0332,55.0176                            |
| 70  | 26   | 275               | phenolic acids, carb                                                           | C12E7                                                                                                 | C6H5H4O8  | +     | 16.45    | 6,62E+07        | 495.38914      | 495.38277                                             | 177.1133,0853,83.0593,85.1008                                        |
| 71  | 27   | 276               | phenolic acids, carb                                                           | NP-014456                                                                                             | C6H5H4O8  | +     | 16.45    | 6,62E+07        | 495.38914      | 495.38277                                             | 177.1133,0853,83.0593,85.1008                                        |
| 72  | 28   | 326               | phenolic acids, carb                                                           | BUTYL OLEATE                                                                                          | C22H42O2  | +     | 21.3     | 9,25E+05        | 339.32575      | 339.3241                                              | 153.1266,139.1110,125.0954,115.0748,85.1007,71.0851,69.0695          |
| 73  | 29   | 328               | phenolic acids, carb                                                           | MFC00003840                                                                                           | C22H36O4  | +     | 18.44    | 6,40E+06        | 333.2788       | 333.2774                                              | 111.1663,97.1007,101.0592,71.0852,67.0539,57.0696                    |
| 74  | 30   | 339               | phenolic acids, carb                                                           | CM2100000                                                                                             | C14H40O2  | +     | 17.56    | 9,93E+06        | 357.29993      | 357.2994                                              | 115.0748,101.0748,83.0851,61.0281,57.0332                            |
| 75  | 31   | 343               | phenolic acids, carb                                                           | 1,3-BIS(2-METHOXY-5-HYDROXY-2-FURYL)-1,3-OLEATE                                                       | C24H32O10 | +     | 14.8     | 8,43E+05        | 441.3337       | 441.3337                                              | 141.167,99.0436,97.0280,85.0369,63.0332,55.0176                      |
| 76  | 32   | 354               | phenolic acids, carb                                                           | 1-Linoleoyl glycerol                                                                                  | C18H38O2  | +     | 15.84    | 1,06E+07        | 355.28428      | 355.28317                                             | 179.1785,165.1630,107.007,57.0696                                    |
| 77  | 33   | 363               | phenolic acids, carb                                                           | glycidyl ether                                                                                        | C12H18O3  | +     | 17.56    | 7,71E+06        | 339.28937      | 339.2                                                 |                                                                      |

| WS site |     |     | Compound category | Name                                                                                                      | formular    | Ion mode | RT    | Response | theoretical value | Measured value | MS/MS                                                          |
|---------|-----|-----|-------------------|-----------------------------------------------------------------------------------------------------------|-------------|----------|-------|----------|-------------------|----------------|----------------------------------------------------------------|
| 1       | 1   | 5   | phenylpropanoid   | 3,5,7-Trihydroxy-4H-chromen-4-one                                                                         | C9 H6 O5    | +        | 3.66  | 3.11E+06 | 195.0288          | 195.0281       | 167.0334,109.0280                                              |
| 2       | 2   | 6   | phenylpropanoid   | Umbelliferone                                                                                             | C9 H6 O3    | +        | 12.89 | 1.57E+06 | 163.0390          | 163.0383       | 135.0434,119.0486                                              |
| 3       | 3   | 476 | phenylpropanoid   | 6- <i>t</i> -Butyl-4-methylcoumarin                                                                       | C14 H16 O2  | +        | 11.09 | 9.98E+04 | 217.1223          | 217.1214       | 57.0696                                                        |
| 4       | 4   | 512 | phenylpropanoid   | Nordihelol                                                                                                | C12 H8 O5   | +        | 4.60  | 4.50E+06 | 233.0444          | 233.0435       | 215.0332,191.0332,135.0435,99.0071,57.0333                     |
| 5       | 5   | 533 | phenylpropanoid   | NP-020400                                                                                                 | C12 H18 O5  | +        | 6.51  | 1.97E+06 | 243.1227          | 243.1216       | 169.0851,151.0746,137.0591,57.0332                             |
| 6       | 6   | 547 | phenylpropanoid   | (5,7-Dihydroxy-4-methyl-2-oxo-2H-chromen-3-yl)acetic acid                                                 | C12 H10 O6  | +        | 4.59  | 3.46E+07 | 251.0550          | 251.0539       | 191.0329,179.0333,162.0305,135.0433,71.0124                    |
| 7       | 7   | 550 | phenylpropanoid   | 6-Methoxy-4-oxo-4H-chromene-2-carboxylic acid                                                             | C11 H8 O5   | +        | 4.32  | 2.53E+06 | 221.0444          | 221.0437       | 193.0486,177.0537,175.0381,161.0588                            |
| 8       | 575 |     | phenylpropanoid   | Scoparone                                                                                                 | C11 H10 O4  | +        | 7.32  | 1.33E+06 | 207.0652          | 207.0644       | 175.0381,165.0539                                              |
| 9       | 9   | 577 | phenylpropanoid   | 2,4-Dihydroxy-6-pyruvoylbenzoic acid                                                                      | C10 H8 O6   | +        | 4.58  | 1.89E+06 | 225.0394          | 225.0385       | 197.0435,179.0330,163.0382,55.0176                             |
| 10      | 10  | 578 | phenylpropanoid   | Fraxetin                                                                                                  | C10 H8 O5   | +        | 4.60  | 1.99E+07 | 209.0444          | 209.0438       | 194.0201,181.0486,177.0174,165.0538                            |
| 11      | 11  | 605 | phenylpropanoid   | (E)-2-Methoxycinnamaldehyde                                                                               | C10 H10 O2  | +        | 8.42  | 3.39E+05 | 163.0754          | 163.0746       | 135.0797,131.0485,121.0642,107.0486,91.0538,77.0383,55.0176    |
| 12      | 1   | 62  | steroid           | Trenbolone Acetate                                                                                        | C20 H24 O3  | -        | 18.26 | 6.28E+06 | 311.1653          | 311.1652       | 311.1652                                                       |
| 13      | 2   | 259 | steroid           | Methandrol                                                                                                | C20 H32 O2  | +        | 15.62 | 3.94E+05 | 305.2475          | 305.2462       | 121.1005,107.0850,95.0850,93.0694,57.0332,55.0540              |
| 14      | 1   | 77  | terpene           | NP-019547                                                                                                 | C17 H26 O5  | +        | 17.80 | 3.51E+05 | 309.1707          | 309.1704       | 309.1704                                                       |
| 15      | 2   | 149 | terpene           | Lup-20(29)-ene-3,28-diol (2E,2'E)bis(3-phenylacrylate)                                                    | C48 H62 O4  | +        | 18.55 | 1.86E+07 | 703.4721          | 703.4717       | 121.1006,91.0538,69.0696,55.0539                               |
| 16      | 3   | 503 | terpene           |                                                                                                           | C13 H18 O   | +        | 8.05  | 3.19E+05 | 191.1430          | 191.1412       | 135.0799,133.1007,109.0643,69.0332,67.0539                     |
| 17      | 1   | 170 | flavonoid         | 5,7-Dihydroxy-2-(4-(4-hydroxyphenyl)-4-oxo-4H-chromen-2-ylidene)-2,3-dihydro-4H-pyran-4-one               | C25 H26 O11 | +        | 13.69 | 6.62E+05 | 503.1548          | 503.1550       | 133.0852,111.0799,107.0487,101.0592,97.0644,57.0696            |
| 18      | 2   | 441 | flavonoid         | Taxifolin                                                                                                 | C15 H12 O7  | +        | 7.14  | 5.23E+05 | 305.0656          | 305.0642       | 153.0175,151.0382,149.0225,139.0383,135.0435,127.0383,109.0278 |
| 19      | 3   | 443 | flavonoid         | Ouerceitin                                                                                                | C15 H10 O7  | +        | 8.04  | 1.01E+07 | 303.0499          | 303.0485       | 165.0173,153.0175,123.0434,109.0278                            |
| 20      | 1   | 469 | quinone           | DK3970000                                                                                                 | C14 H20 O2  | +        | 8.57  | 1.74E+05 | 221.1536          | 221.1528       | 83.0851,57.0696                                                |
| 21      | 1   | 13  | phenolic acids    | (E)-3-cyclohexylacrylic acid                                                                              | C9 H14 O2   | +        | 5.15  | 5.23E+05 | 155.1067          | 155.1060       | 137.0954,127.0748,109.1007,83.0852                             |
| 22      | 2   | 20  | phenolic acids    | D-diacyltartaric anhydride                                                                                | C8 H8 O7    | +        | 13.87 | 3.64E+05 | 217.0343          | 217.0335       | 129.0540,97.0278,85.0280                                       |
| 23      | 3   | 21  | phenolic acids    | isovanillic acid                                                                                          | C8 H8 O4    | +        | 1.52  | 2.08E+06 | 169.0495          | 169.0487       | 151.0383,141.0539,137.0226,123.0434                            |
| 24      | 4   | 26  | phenolic acids    | Coumarandione                                                                                             | C8 H4 O3    | +        | 12.89 | 1.23E+07 | 149.0233          | 149.0228       | 121.028                                                        |
| 25      | 5   | 29  | phenolic acids    | Ethyl acetosuccinate                                                                                      | C9 H10 O5   | +        | 16.35 | 1.85E+07 | 195.0652          | 195.0646       | 89.0593,87.0437,75.0438,57.0333                                |
| 26      | 6   | 35  | phenolic acids    | (2Z)-2-(1,4-Dioxan-2-yl)-2-butenedioic acid                                                               | C8 H10 O6   | +        | 1.52  | 4.10E+05 | 189.0758          | 203.0542       | 129.0539,115.0384,87.0436,71.0487,57.0333                      |
| 27      | 7   | 36  | phenolic acids    | 5-Ethoxy-2-furoic acid                                                                                    | C7 H8 O4    | +        | 4.49  | 3.24E+06 | 157.0495          | 157.0488       | 139.0384,129.0177,111.0436,97.0644,83.0123                     |
| 28      | 8   | 39  | phenolic acids    | 2-Methoxyresorcinol                                                                                       | C7 H8 O3    | +        | 1.52  | 1.72E+07 | 141.0546          | 141.0540       | 123.0435,109.0279                                              |
| 29      | 9   | 44  | phenolic acids    | D-pinitol                                                                                                 | C7 H14 O6   | +        | 1.52  | 2.72E+07 | 195.0863          | 195.0859       | 177.0752,159.0646,145.0490,141.0541,127.0385,85.0281,53.0384   |
| 30      | 10  | 49  | phenolic acids    | Monomethyl adipate                                                                                        | C7 H12 O4   | +        | 13.71 | 1.89E+06 | 161.0808          | 161.0801       | 143.0696,129.0540,115.0749,111.0436,101.0593,83.0488           |
| 31      | 11  | 57  | phenolic acids    | Ethyl acetosuccinate                                                                                      | C7 H10 O5   | +        | 16.35 | 1.85E+07 | 195.0652          | 195.0646       | 115.0384,115.0278,87.0437,85.0280,57.0333                      |
| 32      | 12  | 71  | phenolic acids    | 5-Hydroxy-4-methoxy-5,6-dihydro-2H-pyran-2-one                                                            | C6 H8 O4    | +        | 3.10  | 7.28E+07 | 145.0495          | 145.0489       | 127.0384,83.0125,55.0176                                       |
| 33      | 13  | 86  | phenolic acids    | Koic acid                                                                                                 | C6 H6 O4    | +        | 4.33  | 1.87E+06 | 143.0339          | 143.0332       | 125.0227,115.0384,101.0228,85.0280,57.0332                     |
| 34      | 14  | 87  | phenolic acids    | 5-Hydroxymethyl-2-furaldehyde                                                                             | C6 H6 O3    | +        | 1.52  | 3.42E+07 | 127.0390          | 127.0384       | 109.0179,99.0436,97.0280,81.0332,69.0332,55.0176               |
| 35      | 15  | 126 | phenolic acids    | 2,2-Bis(hydroxymethyl)propionic acid                                                                      | C5 H10 O4   | +        | 1.51  | 2.69E+06 | 135.0652          | 135.0645       | 117.0541,75.0437,57.0332                                       |
| 36      | 16  | 174 | phenolic acids    | C1216                                                                                                     | C24 H50 O7  | +        | 16.38 | 6.25E+07 | 451.3629          | 451.3610       | 177.1113,133.0854,89.0593,85.1008                              |
| 37      | 17  | 196 | phenolic acids    | Laureth-5                                                                                                 | C22 H46 O6  | +        | 16.38 | 6.17E+07 | 407.3367          | 407.3350       | 133.0853,89.0593,85.1008                                       |
| 38      | 18  | 198 | phenolic acids    | undecathylene glycol                                                                                      | C22 H46 O12 | +        | 6.52  | 3.81E+07 | 503.3062          | 503.3047       | 177.1113,133.0853,89.0593                                      |
| 39      | 19  | 212 | phenolic acids    | Methyl 15-phenylpentadecanoate                                                                            | C22 H36 O2  | +        | 18.34 | 8.61E+05 | 333.2788          | 333.2773       | 93.0694,79.0538,75.0436,57.0332                                |
| 40      | 20  | 218 | phenolic acids    | Ethyl 11-oxo-9-phenanthrenehexanoate                                                                      | C22 H22 O3  | +        | 18.63 | 2.46E+05 | 335.1642          | 335.1653       | 89.0593                                                        |
| 41      | 21  | 231 | phenolic acids    | 5-(1'-Pentadec-8-enyl)benzene-1,3-diol                                                                    | C21 H34 O2  | +        | 18.77 | 6.48E+05 | 319.2632          | 319.2618       | 235.1684,179.1058,165.0904,137.0591,123.0435,111.1163,71.0852  |
| 42      | 22  | 241 | phenolic acids    | 3,6,9,12,15,18-Hexaoxahexacosan-1-ol                                                                      | C20 H42 O7  | +        | 22.33 | 2.63E+07 | 395.3003          | 395.3009       | 71.0851,57.0696                                                |
| 43      | 23  | 243 | phenolic acids    | C12164                                                                                                    | C20 H42 O5  | +        | 16.32 | 6.47E+07 | 363.3105          | 363.3188       | 195.1218,177.1114,133.0854,89.0593,85.1008                     |
| 44      | 24  | 275 | phenolic acids    | 6132055                                                                                                   | C18 H34 O3  | +        | 19.22 | 1.03E+07 | 313.2737          | 313.2723       | 97.1008,81.0695,71.0852,57.0696                                |
| 45      | 25  | 297 | phenolic acids    | Nonaethylene Glycol                                                                                       | C18 H38 O10 | +        | 5.90  | 4.86E+07 | 415.2538          | 415.2522       | 177.1113,133.0854,89.0593,87.0437                              |
| 46      | 26  | 300 | phenolic acids    | (5R)-5-(1-Hydroxytridecyl)-alpha-D-xylopyranose                                                           | C18 H36 O6  | +        | 17.23 | 7.21E+06 | 349.2585          | 349.2563       | 181.0703,179.0547,75.0438                                      |
| 47      | 27  | 302 | phenolic acids    | (12Z)-9,10,11-trihydroxyoctadec-12-enoic acid                                                             | C18 H34 O5  | +        | 17.25 | 6.10E+07 | 331.2479          | 331.2463       | 185.1164,101.0592,75.0427,71.0852,57.0696                      |
| 48      | 28  | 341 | phenolic acids    | 13(S)-HOTfE                                                                                               | C18 H30 O3  | +        | 13.60 | 1.35E+06 | 295.2268          | 295.2255       | 179.1421,161.1317,135.1162,121.1006,107.0850,81.0695,71.0850   |
| 49      | 29  | 342 | phenolic acids    | 1913256                                                                                                   | C18 H30 O   | +        | 14.41 | 1.35E+06 | 263.2369          | 263.2357       | 57.0697                                                        |
| 50      | 30  | 348 | phenolic acids    | Methyl (2S,3R,4S)-2-(beta-D-glucopyranosyloxy)-4-(2-hydroxy-1-methyl-1H-imidazol-5-yl)-3-methylpentanoate | C18 H26 O11 | +        | 6.52  | 7.55E+06 | 419.1548          | 419.1533       | 131.0333,113.0228,97.0280,85.0281,73.0281,71.0124,57.0333      |
| 51      | 31  | 365 | phenolic acids    | PEG n8                                                                                                    | C16 H34 O9  | +        | 5.58  | 9.62E+07 | 371.2276          | 371.2258       | 177.1113,133.0853,101.0593,89.0593                             |
| 52      | 32  | 371 | phenolic acids    | Gemcabene                                                                                                 | C16 H30 O5  | +        | 12.21 | 3.36E+06 | 303.2166          | 303.2153       | 101.0593,97.1008,87.0436,83.0487,55.0540                       |
| 53      | 33  | 407 | phenolic acids    | 6-(7-methyloctyl)-1H-3H-4H-6H-furo[3,4-c]furan-1-ol                                                       | C15 H24 O3  | +        | 11.54 | 9.36E+04 | 253.1798          | 253.1788       | 127.0384,99.0436,87.0280,85.1007,71.0852,57.0696               |
| 54      | 34  | 422 | phenolic acids    | 3,5-di-tert-Butyl-4-hydroxybenzaldehyde                                                                   | C15 H22 O2  | +        | 12.39 | 2.97E+06 | 235.1693          | 235.1683       | 179.1058,161.0952,57.0696                                      |
| 55      | 35  | 431 | phenolic acids    | Atracylon                                                                                                 | C15 H20 O   | +        | 12.63 | 1.52E+05 | 217.1587          | 217.1579       | 135.0798,109.1007,93.0695,95.0487,81.0696,55.0540              |
| 56      | 36  | 451 | phenolic acids    | MFC00054545                                                                                               | C14 H26 O5  | +        | 10.75 | 2.58E+06 | 275.1853          | 275.1841       | 97.0644,89.0593,81.0695,71.0488,59.0488,55.0540                |
| 57      | 37  | 470 | phenolic acids    | (2S,4R,5S,6S,7R)-5,6,12,14-tetrahydroxy-4-(hydroxymethyl)-2-methylpentanoic acid                          | C14 H16 O9  | +        | 4.59  | 1.43E+08 | 329.0867          | 329.0852       | 211.0228,209.0435,195.0280,103.0386,85.0281,69.0332            |
| 58      | 38  | 478 | phenolic acids    | 4-Methylbenzophenone                                                                                      | C14 H12 O   | +        | 11.64 | 2.06E+07 | 197.0961          | 197.0952       | 19.0486,105.0330,91.0538,77.0382                               |
| 59      | 39  | 484 | phenolic acids    | 1,4-Dioxacyclotetradecan-5-one                                                                            | C13 H24 O3  | +        | 12.34 | 1.58E+06 | 229.1798          | 229.1789       | 155.1423,99.0436,71.0852,57.0696                               |
| 60      | 40  | 506 | phenolic acids    | ionene                                                                                                    | C13 H18     | +        | 10.76 | 3.35E+05 | 175.1481          | 175.1475       | 133.1007,119.0850,105.0694,91.0538,83.0851                     |
| 61      | 41  | 509 | phenolic acids    | 3a,8b-Dihydroxy-2-(hydroxymethyl)-4-oxo-4,8b-dihydro-2H-pyran-4-one                                       | C13 H10 O7  | +        | 3.66  | 5.71E+06 | 279.0499          | 279.0486       | 139.0384,121.0278,119.0485,107.0486,95.0487,85.0281            |
| 62      | 42  | 511 | phenolic acids    | Benzophenone                                                                                              | C13 H10 O   | +        | 10.86 | 1.13E+06 | 183.0804          | 183.0798       | 105.0330,77.0381                                               |
| 63      | 43  | 536 | phenolic acids    | NP-021018                                                                                                 | C12 H18 O4  | +        | 15.25 | 1.06E+06 | 227.1278          | 227.1269       | 1167.0696,139.0747,121.1006,95.0487,83.0851,69.0696            |
| 64      | 44  | 556 | phenolic acids    | Methyl 10-oxodecanoate                                                                                    | C11 H20 O3  | +        | 10.82 | 1.95E+06 | 201.1485          | 201.1476       | 159.1371,141.1265,127.1111,125.0952,101.0592                   |
| 65      | 45  | 560 | phenolic acids    | 3,3-Dimethyl-1,5-dioxaspiro[5.5]undecan-9-one                                                             | C11 H18 O3  | +        | 13.56 | 1.45E+05 | 199.1329          | 199.1321       | 125.0591,111.0797,95.0487,85.0643,57.0332                      |
| 66      | 46  | 568 | phenolic acids    | 4-Ethoxy ethylbenzoate                                                                                    | C11 H14 O3  | +        | 11.47 | 1.18E+06 | 195.1016          | 195.1008       | 167.0695,149.0591,121.0279,113.0592                            |
| 67      | 47  | 570 | phenolic acids    | 4-Isobutylbenzoic acid                                                                                    | C11 H14 O2  | +        | 10.57 | 3.13E+05 | 179.1067          | 179.1058       | 133.1004,95.0487                                               |
| 68      | 48  | 585 | phenolic acids    | PEG n5                                                                                                    | C10 H22 O6  | +        | 4.29  | 6.03E+06 | 239.1489          | 239.1489       | 221.1385,177.1113,151.0599,133.0853,89.0593                    |
| 69      | 49  | 589 | phenolic acids    | NP-019374                                                                                                 | C10 H18 O4  | +        | 16.67 | 6.24E+06 | 203.1278          | 203.1272       | 185.1163,157.1216,125.0954,111.0799,101.0593,83.0488           |
